**Atrial t-tubules adopt a specialist developmental state while alterations to Ca<sup>2+</sup> buffering maintain systolic Ca<sup>2+</sup> during postnatal development**

Smith CER, Clarke JD, Quinn CJ, Sultan Z, Najem H, Denham NC, Hutchings DC, Madders GWP, Caldwell JL, Toms LK, Pinali C, Eisner DA, Trafford AW and Dibb KM\*

Division of Cardiovascular Sciences, Unit of Cardiac Physiology, School of Medical Sciences, Faculty of Biology, Medicine and Health, The University of Manchester, Manchester Academic Health Science Centre, 3.14 Core Technology Facility, 46 Grafton Street, Manchester, M13 9NT, United Kingdom.

\*Corresponding Author

Katharine.Dibb@manchester.ac.uk

## Abstract

Transverse (t)-tubules ensure a uniform rise in calcium ( $\text{Ca}^{2+}$ ) and thus contraction in cardiac cells. Though more extensively studied in the ventricle, t-tubules also play a key role in the atria of large mammals, such as human, and their loss in heart failure is associated with impaired  $\text{Ca}^{2+}$  release and thus contractility. T-tubule restoration is therefore an ideal therapeutic target but the process of t-tubule formation is not understood. The aim of this study was to determine how t-tubules develop in the healthy atria and the impact this has on  $\text{Ca}^{2+}$  handling. Postnatal development was assessed in sheep from newborn through to adulthood. Atrial t-tubules were present at birth in the sheep atria and increased in density up until 3 months of age. In the latter part of development (3 months to adult) a lack of t-tubule growth but increase in cell width results in t-tubule density decreasing. In the newborn, despite reduced t-tubule density, we found the amplitude of the  $\text{Ca}^{2+}$  transient was maintained and this was associated with increases in the L-type  $\text{Ca}^{2+}$  current ( $I_{\text{Ca-L}}$ ) and the  $\text{Ca}^{2+}$  content of the sarcoplasmic reticulum (SR). We suggest these changes are sufficient to overcome the elevated cytosolic  $\text{Ca}^{2+}$  buffering in the newborn and the decreased t-tubule density. We have shown the neonate atria is highly specialised to negate reduced central  $\text{Ca}^{2+}$  release through enhanced surface  $I_{\text{Ca-L}}$  and SR load. This maintains atrial function despite immature t-tubules highlighting important differences in  $\text{Ca}^{2+}$  handling in the newborn and heart failure atria where t-tubules are sparse.

## 1. Introduction

Transverse (t)-tubules play a key role in facilitating a uniform rise in calcium ( $\text{Ca}^{2+}$ ) throughout the cell. They contain L-type  $\text{Ca}^{2+}$  channels (LTCC) that closely couple to ryanodine receptors (RyR) of the sarcoplasmic reticulum (SR) ensuring synchronous  $\text{Ca}^{2+}$  release throughout the myocyte. T-tubules are found in all mammalian ventricular myocytes[1, 2] and in the atria of large mammals[3-7] where they play an important role in triggering  $\text{Ca}^{2+}$  release similar to the ventricle[5, 8, 9]. Heart failure (HF) results in extensive t-tubule remodelling, particularly in the atria[2, 5]. Similarly to some studies in the ventricle[10-12], we have previously shown that atrial t-tubule loss in HF is associated with reduced LTCC current ( $I_{\text{Ca-L}}$ ) and consequently reduced systolic  $\text{Ca}^{2+}$  release[13]. As the contribution of atrial contraction to ventricular filling increases in HF[14], atrial t-tubule loss likely contributes to overall cardiac dysfunction. As such, the restoration or preservation of t-tubules, including those in the atria, would be beneficial therapeutically. However, despite the importance of t-tubules in triggering central  $\text{Ca}^{2+}$  release in the atria of large mammals, little is currently known about the process by which atrial t-tubules develop.

Ventricular t-tubules are absent or sparse at birth and develop postnatally resulting in changes in excitation-contraction (EC) coupling [8, 9, 15-21]. In the rabbit ventricle the absence of t-tubules in early life means LTCCs occur exclusively on the surface sarcolemma[22] resulting in reduced  $I_{\text{Ca-L}}$ , impaired coupling with the SR and thus decreased systolic  $\text{Ca}^{2+}$  release[15, 16, 23-26]. In the newborn rabbit ventricle  $\text{Ca}^{2+}$  influx via reverse-mode operation of the sodium-calcium exchanger (NCX) is sufficient to generate contraction, compensating for reduced  $I_{\text{Ca-L}}$  and bypassing SR-mediated  $\text{Ca}^{2+}$  release[27-30]. As t-tubules develop,  $I_{\text{Ca-L}}$  and the reliance on SR  $\text{Ca}^{2+}$  release increases bringing about a more uniform rise in  $\text{Ca}^{2+}$  and a gain in EC coupling[15, 25, 31].

In newborn atrial cells we have shown enhanced  $\text{Ca}^{2+}$  release sites occur on the cell surface which we suggest helps to maintain the systolic  $\text{Ca}^{2+}$  transient when t-tubules are sparse [9]. While ventricular t-tubule development has been described, how atrial t-tubules develop postnatally and their influence on atrial EC coupling is unknown. By examining how t-tubules develop and the concomitant changes in  $\text{Ca}^{2+}$  handling in the atria, we sought to understand the factors that maintain the systolic  $\text{Ca}^{2+}$  transient when the t-tubule network is sparse in the newborn and extensive in the adult.

Here we show the time course for t-tubule development and  $\text{Ca}^{2+}$  handling changes in the atria. We report that in early life, when t-tubules are sparse, the  $\text{Ca}^{2+}$  transient amplitude is maintained by elevated  $I_{\text{Ca-L}}$  and SR load that offset increased intracellular  $\text{Ca}^{2+}$  buffering. As t-tubules develop they adopt a specialist developmental state, at 3 months post birth, characterised by increased t-tubule size and density which appear more complex in arrangement. Our data suggests increased t-tubules and triggered  $\text{Ca}^{2+}$  release allows  $I_{\text{Ca-L}}$  and SR load to decrease to adult levels; throughout this transition atrial cells are able to maintain the amplitude of the  $\text{Ca}^{2+}$  transient due to a decrease in intracellular  $\text{Ca}^{2+}$  buffering.

## 2. Methods

All procedures were carried out in accordance with The United Kingdom (Scientific Procedures) Act 1986, the European Union directive EU/2010/63 and the ARRIVE guidelines for reporting the use of animals in scientific experiments.

### 2.1 Sheep model of development

Sheep aged between 1 day and 1 week (newborn; NB), ~1 month (1M), ~3 months (3M), ~6 months (6M) and adult ~18 months of age (AD) were selected for inclusion in the study. Both males and

females from a range of breeds were included. To track gross postnatal developmental changes, body weight and heart weight were recorded and a heart weight to body weight ratio calculated. In vivo cardiac function was assessed in conscious, non-sedated sheep using electrocardiography and echocardiography. Electrocardiographic measurements were taken using five surface electrodes and recorded for 10 minutes using IOX software (EMKA technologies). ECG recordings were converted from MKT to TXT files in ECG Auto (EMKA technologies) then analysed in Labchart (ADInstruments). Transthoracic echocardiographic images were obtained using a Sonosite Micromaxx (BCF Technology) or Vivid 7 (GE Healthcare) with short-axis 2D views at the mid-papillary muscle level recorded[32]. Images were converted using either VirtualDub or MicroDicom then opened in ImageJ (National Institutes of Health) for analysis. The lumen of the ventricle in diastole and systole in numerous cardiac cycles were drawn around using the polygon area tool and the left ventricular end diastolic area (EDA) and end systolic area (ESA) used to calculate fractional area change during contraction as a measure of contractility. Septal wall thickness (SWT) and posterior wall thickness (PWT) were also measured in diastole (d) and systole (s) on the same images used for EDA and ESA (Figure 2.1). Relative wall thickness was calculated for both SWT and PWT as a % change in thickness between diastole and systole.

## 2.2 Isolation of atrial myocytes

Single myocytes were isolated from the left atrial appendage as described previously[2, 5, 13, 33]. Briefly, heparin (10,000 units) was administered to prevent clotting and animals were euthanased by pentobarbitone overdose (200 mg/kg). Hearts were removed, washed in Ca<sup>2+</sup>-free solution (containing in mM: 134 NaCl, 11 glucose, 10 HEPES, 10 2,3-butanedione monoxime, 4 KCl, 1.2 MgSO<sub>4</sub>, 1.2 NaH<sub>2</sub>PO<sub>4</sub> and 0.5 mg/ml bovine serum albumin, pH 7.34 with NaOH) and the atria separated from the ventricles below the coronary sulcus. The left atrium was cannulated via the circumflex artery or a smaller branch of the circumflex if present and perfused at 37°C with Ca<sup>2+</sup>-free solution. Tissue was enzymatically digested using 0.3 mg/ml collagenase (Type II, Worthington or Type A, Roche) and 1.25 mg/ml pancreatin from porcine pancreas (Sigma) for developmental time points and 0.45-0.55 mg/ml collagenase and 0.05 mg/ml protease (Type XIV, Sigma) for adult animals. Following digestion, tissue was perfused then chopped and gently triturated in a taurine solution (containing in mM: 113 NaCl, 50 taurine, 11 glucose, 10 HEPES, 10 2,3-butanedione monoxime, 4 KCl, 1.2 MgSO<sub>4</sub>, 1.2 NaH<sub>2</sub>PO<sub>4</sub>, 0.1 CaCl<sub>2</sub> and 0.5 mg/ml BSA, pH 7.34 with NaOH). Cells were filtered using a 200 µm nylon CellMicroSieve (Fisher Scientific) and resuspended in taurine solution prior to the reintroduction of Ca<sup>2+</sup> by mixing taurine solution 50:50 with Tyrode's solution (containing in mM: 140 NaCl, 10 HEPES, 10 glucose, 4 KCl, 2 probenecid, 1.8 CaCl<sub>2</sub> and 1 MgCl<sub>2</sub>, pH 7.34 with NaOH). Cells were stored in Tyrode's solution at room temperature prior to experimentation.

## 2.3 Confocal t-tubule imaging

Isolated atrial myocytes were stained with 4 µM di-4-ANEPPS for 10 minutes (Invitrogen) for membrane visualisation[3, 5]. T-tubule stacks were acquired using a Leica SP2 confocal microscope (488 nm excitation, 505 nm long pass emission filter) as described previously with an XY pixel size of 100 nm and Z-step depth of 162 nm[2, 3, 5, 11]. Images were deconvolved using Huygens Software (Scientific Volume Imaging) and a measured point spread function (PSF). Following deconvolution, images were thresholded to remove background fluorescence and a central sub-stack devoid of the top and bottom of the cell selected. The fractional area taken up by t-tubules within a cell as a measure of t-tubule density was calculated using a 2 µm projection binary projection in ImageJ where the number of black pixels (t-tubules) was expressed as a fraction of the total pixels within the cell[2, 11]. The distance 50% of voxels within the cell are to the nearest membrane (t-tubule or surface, t-tubule only and surface only) was also assessed using a custom IDL routine (Excelis VIS) and termed half-

distance as described in detail previously [2, 3, 5, 11]. Here central image stacks were interpolated using the 'congrid' routine to give the same spacing in x, y and z and then the 'morph\_distance' routine ran to create a distance map of voxel distance to membrane. To assess distance to t-tubules only and surface only the cell surface sarcolemma or t-tubules were removed respectively in ImageJ prior to running through IDL.

## 2.4 Electrophysiological recordings of intracellular $\text{Ca}^{2+}$ and $I_{\text{Ca-L}}$

To permit measurement of free intracellular  $\text{Ca}^{2+}$ ,  $[\text{Ca}^{2+}]_i$ , myocytes were loaded with 5  $\mu\text{M}$  Fluo-5F AM (ThermoFisher) for 10 minutes and allowed to de-esterify for at least 30 minutes before experimentation. Measurements of  $[\text{Ca}^{2+}]_i$  and membrane currents were made simultaneously under voltage clamp control using the perforated patch method with 240  $\mu\text{g/ml}$  amphotericin-B added to a  $\text{K}^+$ -based pipette solution (containing in mM: 125  $\text{KCH}_3\text{O}_3\text{S}$ , 20 KCl, 10 NaCl, 10 HEPES, 5  $\text{MgCl}_2$ , pH 7.2 with KOH) [13, 35-37]. Cells were stimulated at 0.5 Hz using a 100 ms step from -40 to +10 mV and superfused with an experimental solution (containing in mM: 140 NaCl, 10 HEPES, 10 glucose, 5 4-AP, 4 KCl, 2 probenecid, 1.8  $\text{CaCl}_2$ , 1  $\text{MgCl}_2$ , 0.4 DIDS and 0.1  $\text{BaCl}_2$ , pH to 7.34 with NaOH). Probenecid was included to decrease indicator loss from the cell. A hyperpolarising step from -40 to -50 mV was applied to measure cell capacitance and thus surface area [38]. To assess SR  $\text{Ca}^{2+}$  content and buffering capacity, 10 mM caffeine was applied with the resultant  $\text{Na}^+$ - $\text{Ca}^{2+}$  exchange (NCX) current integrated and assessed alongside the caffeine-evoked  $\text{Ca}^{2+}$  transients as described previously [13, 33, 35-37, 39, 40]. The contribution of pathways other than  $I_{\text{NCX}}$  to  $\text{Ca}^{2+}$  removal during caffeine application was unaltered during development (Supplemental Figure 3). Therefore, we used our previously published NCX correction factor of 1.14 throughout this study [33].  $\text{Ca}^{2+}$  buffering was assessed as previously described [33, 41], with the relationship between and total intracellular  $\text{Ca}^{2+}$  measured from the corrected integral of  $I_{\text{NCX}}$  and intracellular free  $\text{Ca}^{2+}$  obtained from Fluo-5F and fit with the following hyperbolic equation (equation 1):

$$\text{Ca}_T = a + \frac{B_{\text{max}} \cdot [\text{Ca}^{2+}]_i}{K_d + [\text{Ca}^{2+}]_i}$$

For which  $\text{Ca}_T$  is total  $\text{Ca}^{2+}$ ,  $a$  is an offset because the relationship cannot be determined for values of  $[\text{Ca}^{2+}]_i$  below the resting level,  $B_{\text{max}}$  is the maximum buffering capacity for  $\text{Ca}^{2+}$ ,  $[\text{Ca}^{2+}]_i$  is the free intracellular  $\text{Ca}^{2+}$  and  $K_d$  is the dissociation constant of the buffers.  $\text{Ca}^{2+}$  buffer power was calculated as previously described [33, 40] from the  $B_{\text{max}}$  and  $K_d$  values obtained above using equation 2:

$$\frac{d(\text{Ca}_T)}{d[\text{Ca}^{2+}]_i} = \frac{B_{\text{max}} \cdot K_d}{([\text{Ca}^{2+}]_i + K_d)^2}$$

The increase of  $\text{Ca}_T$  during the  $\text{Ca}^{2+}$  transient ( $\Delta[\text{Ca}]_{\text{Total}}$ ) was calculated from the resting and peak systolic  $[\text{Ca}^{2+}]_i$  and the buffer properties.

## 2.5 Cell volume and nucleation

Isolated atrial myocytes were loaded with 20  $\mu\text{mol/l}$  calcein-AM for 20 minutes at room temperature and image stacks acquired as described previously at an xyz resolution of 210 nm [13, 33, 35] (Supplemental Figure 2). Cell stacks were thresholded using half the maximum intensity of the plot profile and cell volume calculated from the number of voxels within the cell [35]. Surface area to volume ratios were calculated using a similar approach to [13, 33, 38] though as values could not be obtained from within the same cells the mean cell volume and cell capacitance for each time point was used (Supplemental Figure 2E). As calcein loading permitted visualisation of nuclei, the number

of nuclei per cell was counted to assess the proportion of cell binucleation as a measure of developmental maturity.

## 2.6 Electron microscopy tissue processing and imaging

Left atrial appendage tissue was collected from newborn, 3 months and adult sheep and fixed in 2.5% glutaraldehyde and 2% paraformaldehyde in 100 mM sodium cacodylate buffer, pH 7.2. Following washing with sodium cacodylate buffer, samples were stained in 2% osmium tetroxide and 1.5% potassium ferrocyanide; 1% thiocarbohydrazide; 2% osmium tetroxide, 1% uranyl acetate and Walton's lead nitrate with water washes between each step as previously described but with small adaptations [42-44]. Following staining, an ascending series of ethanol (50%, 70%, 90%, 100%, 100%) then propylene oxide was used to dehydrate samples prior to infiltration treatment with increasing concentrations of TAAB 812 hard resin mixed with propylene oxide (25%, 50%, 75%, 100%). Samples were then embedded in pure resin inside plastic moulds and baked for 36 hours at 60°C. For imaging, samples were cut from moulds, mounted onto cryo pins and coated in a gold-palladium alloy. Serial images were obtained at 50 nm intervals with a pixel size of 6-12.5 nm using a Quanta 250 FEG scanning electron microscope and Gatan 3View device operated at 3.8 kV and approximately 0.46 Torr. Image stacks were opened and t-tubule reconstruction and volumetric analysis was performed in 3DMod (IMOD) [43, 45] .

## 2.7 Immunoblotting

Left atrial appendage tissue was chopped into 1 mm<sup>3</sup> chunks and rapidly snap frozen in liquid nitrogen. Tissue was homogenised in RIPA buffer containing protease and phosphatase inhibitors (0.1 mg/ml phenylmethanesulphonyl fluoride, 100 mmol/l sodium orthovanadate, 1mg/ml aprotinin, 1mg/ml leupeptin) and protein concentration assessed by using a Bradford assay. Samples were run on NuPAGE 4-12% Bis-Tris gels (ThermoFisher) and then transferred onto nitrocellulose membranes (GE Healthcare) as described previously [2, 11, 13, 33]. Total protein was stained using Ponceau S (Applichem Lifescience) and membranes imaged prior to blocking in 5% BSA, SEABLOCK® (ThermoFisher) or 5% milk. Membranes were incubated with primary antibodies targeted to AMPII (1:200, Santa Cruz Biotechnology), JPH2 (1:5000, Santa Cruz Biotechnology) or TCAP (1:1000, Abcam) followed by HRP-conjugated anti-mouse, anti-goat and anti-rabbit secondary antibodies (1:40,000, Santa Cruz Biotechnology). Chemiluminescence substrate (GE Healthcare) was added for protein detection via digital capture (Genesnap, Syngene). All blots were run in triplicate, with target protein expression normalised to total protein levels and an internal control standard that was loaded on each gel as previously described [2, 10].

## 2.8 Statistics

Data was tested for normality using the Kolmogorov-Smirnov or the Shapiro-Wilk test (GraphPad Prism or SPSS statistics, IBM) and transformed if required. Statistical significance was assessed using one way ANOVA (GraphPad Prism), Chi-square (SigmaPlot), two way ANOVA or linear mixed modelling (SPSS Statistics, IBM) as appropriate, with mixed modelling used to account for multiple observations from the same animal. Data are presented as mean ± SEM for *N* animals and *n* cells or repeats, with these observations shown behind mean data on graphs as filled or open circles respectively. Statistical significance was attained when  $p < 0.05$ , with \* showing significant difference vs adult and \$ showing significant difference vs previous time point.

### 3. Results

#### 3.1 Atrial t-tubules grow until 3 months of age despite increasing cell width into adulthood

We firstly mapped development of the heart using echocardiography and the electrocardiogram (ECG; Supplemental Figure 1A). Left ventricular systolic function was maintained throughout development despite the change in heart size over the first 3 months (Supplemental Figure 1A). Heart rate decreased to 6 months of age while atrial electrical parameters, P wave duration and PR interval, increased to 3 months of age and then plateaued (Supplemental Figure 1B). In terms of the ventricle, QRS duration did increase between newborn and adult but the corrected QT interval was unaltered with age (Supplemental Figure 1B). Taken together this data suggests maturation of the ventricle may occur before that of the atria.

As we have shown in newborn tissue (<1 day old; [9]) we found sporadic t-tubules present in isolated atrial myocytes from newborn animals up to 1 week of age (Figure 1A). Both t-tubule density and cell width increased during development and as cells matured binucleation increased (Figure 1A and Supplemental Figure 2A-C). The role of t-tubules is to minimise the distance between the cell membrane and the Ca<sup>2+</sup> release machinery. Therefore we assessed t-tubule density by calculating the average distance of all points within the cell to the nearest membrane in the x, y or z dimension using distance maps as described previously (half distance; [2, 3, 5, 11]). The half distance to any membrane (t-tubule and surface; Figure 1Bi inset) decreased between newborn and 3 months of age indicative of t-tubule growth (Figure 1Bi;  $p < 0.001$ ). However, this reduction was reversed beyond 3 months into adult with surprisingly no difference in half distance to membrane observed between newborn and adult.

We next separated the contribution of t-tubules and surface membrane to the half distance measurement (Figure 1Bii&iii). Consistent with increasing cell width throughout development the half distance to the surface membrane increased into adulthood (Figure 1Biii,  $p < 0.001$ ). Similarly to the half distance to all membranes, half distance to t-tubules also displayed a U-shaped relationship with age, suggesting t-tubule growth over the first 3 months predominated over the increase in cell width (Figure 1Bii,  $p < 0.001$ ). However, after 3 months of age the increase in half distance to t-tubules suggests increasing cell width predominates (Figure 1Bii). As expected, half distance is decreased in the adult vs newborn consistent with the increased importance of t-tubules. Thus, atrial t-tubule development is not directly related to increasing cell width. We next investigated if t-tubule growth stopped at 3 months of age despite cells still being immature.

The fractional area of the cell occupied by t-tubules increased to 3 months of age as t-tubules grew (purple symbols, Figure 1C). The white symbols show projected fractional area values assuming no t-tubule growth from the previous time point. For example, if the t-tubules present in newborn cells were put into a 1 month cell we would predict fractional area to decrease from 0.022 to 0.015. Instead, measured fractional area at 1 month was 0.045 thus showing continued t-tubule formation. At 1 and 3 months t-tubule fractional area was greater than predicted (purple > white) confirming t-tubule growth. The fact that the symbols overlay in the adult (purple symbol is behind the white symbol) suggests between 3 months and adult cell growth occurs without t-tubule growth. Therefore t-tubule growth stops at 3 months and the continued increase in cell size results in a decrease in t-tubule density between 3 months and adulthood (Figure 1C). This is consistent with the lack of change in cell capacitance between 3 months and adulthood despite increases in cell volume and width (Supplemental Figure 2C-D). To determine if t-tubule growth correlates with gross cardiac development we measured developmental changes in body and heart weight (Supplemental Figure 1C). Both parameters increased after t-tubule growth stopped (3 months) however the ratio between



the two was unchanged after 3 months of age showing further growth of the heart and body occurred at the same relative rate.

### **3.2 BIN1, JPH2 and TCAP reveal distinct expression changes during t-tubule development.**

To understand if known t-tubule associated proteins could be involved in t-tubule growth we quantified the expression levels of BIN1 (also known as Amphiphysin-2), Junctophilin-2 (JPH2) and Telethonin (TCAP; Figure 1D-G). Two bands at 51 and 35 kDa were identified for BIN1 as previously reported[2]. Expression of both 51 kDa BIN1 and JPH2 were increased during the t-tubule growth phase but had decreased to adult levels once t-tubule were formed (3 months; Figure 1E&F;  $p < 0.001$ ). Changes in the 35 kDa band or total BIN1 did not correlate with t-tubule development (Figure 1Eii-iii). Unlike BIN1 (51 kDa) and JPH2, TCAP expression increased during early life (Figure G;  $p < 0.01$ ). Therefore, although based on an association, our data suggests a possible role for BIN1 (51 kDa isoform) and JPH2 in t-tubule formation or organisation in the dyad and TCAP in t-tubule extension and maintenance in the adult. Next, we examined the ultrastructure of developing atrial t-tubules to identify structural changes which underpin the increase in t-tubule density at 3 months.

### **3.3 Distinct t-tubule morphologies during development account for changes in t-tubule density and structure**

Since confocal microscopy lacks the resolution to understand the detailed structure of t-tubules we used serial block face Scanning Electron Microscopy to resolve detailed atrial t-tubule ultrastructure (sbfSEM; Figure 2). T-tubules were manually reconstructed from sbfSEM images of newborn, 3 months and adult cells and typical examples are shown in transverse and longitudinal orientation (Figure 3A; t-tubules white and cell surface purple). T-tubules in newborn were usually sporadic and shorter in length compared to those in later life, however we did observe a single cell where t-tubules appeared almost fully developed at birth. Interestingly, the improved resolution revealed that t-tubules present at 3 months were more complex in structure compared to newborn and adult (Figure 2A). Similarly to confocal data, t-tubule density measured from sbfSEM images (t-tubule volume/10 sarcomeres) increased from birth to 3 months and declined to adulthood (Figure 2B,  $p < 0.001$ ). Increasing t-tubule density occurred via an increase in both the number and volume of t-tubules while increased volume was due to increases in both t-tubule diameter and branching (Figure 2C-F;  $p < 0.001$ ). The decrease in t-tubule density into adulthood was not due to a change in t-tubule number (Figure 2C;  $p = 0.99$ ) but was associated with a non-significant decrease in t-tubule volume (Figure 2D;  $p = 0.2$ ) suggesting changes in t-tubule size or morphology were likely responsible. Consistent with this concept, decreases in t-tubule diameter (Figure 3E;  $p < 0.05$ ) and branching (non-significant, Figure 3F) in the adult suggests t-tubule dilatation or increased complexity at 3 months underlies the increased t-tubule density compared to the adult. Interestingly, t-tubule volume, diameter and branching returned to newborn levels in the adult suggesting t-tubule morphology at 3 months is distinct. To determine if this was the case, t-tubule morphology was categorised into mature structures (based on the most common morphologies seen in adult), t-tubule stumps (immature short t-tubule extensions) and disordered t-tubules which encompass complex, branched and more longitudinally orientated tubules.

Consistent with t-tubule growth from small invaginations, short stumps were most common in the newborn and decreased throughout development whereas mature t-tubule morphologies increased, consistent with t-tubule elongation (Figure 2G). This pattern is reflected in the percentage of the total t-tubule volume these structures account for, with the contribution of stumps decreasing with development but the contribution of mature t-tubules increasing (Figure 2I). The presence of stumps at all time points is consistent with continued t-tubule turnover throughout life. The number of



disordered morphologies was low (Figure 2G) but since they were larger (increased volume; Figure 2H) they made significant contributions to the overall t-tubule volume (Figure 2I). Consistent with the overall t-tubule complexity and increased t-tubule volume and branching at 3 months (Figure 2A,D&F), we observed an increase in the volume of disordered morphologies at 3 months (Figure 2H).

We investigated if the complexity or increased volume of t-tubules at 3 months was due to t-tubules arising from the sarcolemma at points other than the z-line (Figure 2J). The number of t-tubule arising from a non-z-line location increased at 3 months (Figure 2Ji;  $p < 0.001$ ) and may therefore play a role in the t-tubule disorder observed. However, the point of t-tubule origin did not explain the large t-tubule volume at 3 months (Figure 2Jii).

In the ventricle, previous studies have shown that t-tubule growth is associated with increases in the  $\text{Ca}^{2+}$  transient amplitude and  $I_{\text{Ca-L}}$ , and decreased  $I_{\text{NCX}}$  [15, 23, 24, 26-30]. As such, we next sought to investigate whether atrial t-tubule growth in development was associated with changes in  $I_{\text{Ca-L}}$  and  $I_{\text{NCX}}$ .

### 3.4 Elevated $I_{\text{Ca-L}}$ and $I_{\text{NCX}}$ density at birth decrease in early life as t-tubules develop

T-tubule growth during the first 3 months of life was associated with a *decrease* in the density of  $I_{\text{Ca-L}}$ , from  $3.02 \pm 0.16$  pA/pF in newborn to  $1.91 \pm 0.15$  pA/pF at 3 months which was then unaltered into adulthood (Figure 3Ai&ii;  $p < 0.001$ ). Decreased  $I_{\text{Ca-L}}$  density occurred due to increased cellular capacitance during the t-tubule development stage (Supplemental Figure 2D) which predominated over the increase in pA of  $I_{\text{Ca-L}}$  (Supplemental Table 1,  $p < 0.001$ ). Our data suggests an increased abundance of LTCCs at the membrane in the newborn *prior to t-tubule formation*. As t-tubules develop up to 3 months, LTCCs continue to increase however those incorporated into t-tubules likely originate from both the surface membrane and as newly formed channels. Interestingly the rate of  $I_{\text{Ca-L}}$  inactivation was unaltered during development (Figure 3Bi-ii,  $p = 0.28$ ) suggesting  $\text{Ca}^{2+}$  dependent inactivation was unchanged. In the newborn the increase in peak  $I_{\text{Ca-L}}$  and lack of change in inactivation gave rise to an increase in the integrated  $I_{\text{Ca-L}}$  which decreased to adulthood (Figure 3C;  $p < 0.001$ ).

We next investigated the coupling between  $I_{\text{Ca-L}}$  and SR  $\text{Ca}^{2+}$  release. By measuring  $I_{\text{Ca-L}}$  decay on the beat immediately following caffeine application, when the SR was empty, we determined the rate of decay of  $I_{\text{Ca-L}}$  when  $\text{Ca}^{2+}$ -dependant inactivation was minimal (Figure 3Di; dotted line and 3Dii) and compared this to the rate of decay of  $I_{\text{Ca-L}}$  under steady state conditions (Figure 3D; solid line). The rate of inactivation on the beat immediately following caffeine application was expressed as a fraction of the steady state inactivation to estimate the proportion of  $I_{\text{Ca-L}}$  decay due to  $\text{Ca}^{2+}$  dependant inactivation which was unchanged in development (Figure 3Diii;  $p = 0.21$ ). Thus  $I_{\text{Ca-L}}$  appears similarly coupled to SR  $\text{Ca}^{2+}$  release at all developmental stages. As we have shown previously [9], RyRs adopt a z-line arrangement at birth (Figure 3E). We were unable to confirm the exact localisation of LTCCs (due to lack of a suitable antibody) but if localization is similar to that for NCX our data is consistent with both surface and t-tubule  $I_{\text{Ca-L}}$  existing in dyads throughout development.

Finally, in a similar way to  $I_{\text{Ca-L}}$ ,  $I_{\text{NCX}}$  density obtained following caffeine application (Figure 3Fi-ii), and activity for a given  $[\text{Ca}^{2+}]_i$  (Figure 3Gi-ii), decreased to 3 months and was then unchanged to adulthood ( $p < 0.001$  and  $p < 0.01$  respectively). We next investigated if decreased  $I_{\text{Ca-L}}$  in development caused a decrease in the systolic  $\text{Ca}^{2+}$  transient.

### 3.5 Despite increased $I_{\text{Ca-L}}$ in the newborn, $\text{Ca}^{2+}$ transient amplitude was unaltered during development.

Typical  $\text{Ca}^{2+}$  transients recorded in newborn, 3 month and adult cells are shown in Figure 4A. Despite decreased  $I_{\text{Ca-L}}$  and  $I_{\text{NCX}}$  density during development there was no difference in the amplitude of the systolic  $\text{Ca}^{2+}$  transient during development (Figure 4Bi,  $p=0.67$ ). Diastolic  $\text{Ca}^{2+}$  decreased from newborn to 3 months while systolic  $\text{Ca}^{2+}$  was unaltered during development (Figure 4Bii-iii,  $p < 0.01$  and  $p=0.75$  respectively). Despite decreased  $I_{\text{NCX}}$  during development the decay of the  $\text{Ca}^{2+}$  transient was unaltered (Figure 4Ci-ii;  $p=0.19$ ). We next performed experiments to establish if the lack of change in  $\text{Ca}^{2+}$  transient amplitude or rate of decay were due to changes in SR  $\text{Ca}^{2+}$  content or the rate of SERCA mediated  $\text{Ca}^{2+}$  uptake.

### 3.6 Increased SR $\text{Ca}^{2+}$ content is offset by increased cytosolic $\text{Ca}^{2+}$ buffering

SR  $\text{Ca}^{2+}$  content was determined by application of 10 mM caffeine (Figure 5A). The amplitude of the caffeine-evoked  $\text{Ca}^{2+}$  transient was increased in the newborn which is indicative of an increase in SR  $\text{Ca}^{2+}$  content (Figure 5B;  $p < 0.05$ ). The SR  $\text{Ca}^{2+}$  content was calculated by integrating caffeine evoked  $I_{\text{NCX}}$  and correcting for  $\text{Ca}^{2+}$  removed by other pathways (Figure 5Aii-iii, Supplemental Figure 3). SR  $\text{Ca}^{2+}$  content was high in the newborn and decreased to 3 months and adult (Figure 5C;  $p < 0.001$ ). Therefore, a decrease in SR load cannot offset the decrease in  $I_{\text{Ca-L}}$  to explain the lack of change in  $\text{Ca}^{2+}$  transient amplitude during development. We next examined if changes to fractional release during development could help maintain the  $\text{Ca}^{2+}$  transient. The amplitude of the systolic transient was expressed as a fraction of the amplitude of the caffeine evoked  $\text{Ca}^{2+}$  transient (Figure 5D-E). Fractional release was lower in the newborn and increased to 3 months of age ( $p < 0.05$ ; Figure 5E,  $p=0.06$  overall) which would be expected to help maintain systolic  $\text{Ca}^{2+}$  despite decreases in  $I_{\text{Ca-L}}$  and SR  $\text{Ca}^{2+}$  content. Since decreases in  $I_{\text{Ca-L}}$  and SR  $\text{Ca}^{2+}$  content would both be expected to decrease fractional release, we calculated if a decrease in the ratio (SR  $\text{Ca}^{2+}$  content:  $I_{\text{Ca-L(peak)}}$ ) could explain the increase in fractional release. We found SR  $\text{Ca}^{2+}$  content decreased more than  $I_{\text{Ca-L}}$  during development consistent with increased fractional release ( $45.8 \pm 5.3\%$  vs  $31.4 \pm 5.9\%$  respectively). We next set out to determine if, together with increased fractional release, decreased  $\text{Ca}^{2+}$  buffering could also contribute to the maintenance of the  $\text{Ca}^{2+}$  transient during development in the face of decreasing  $I_{\text{Ca-L}}$  and SR  $\text{Ca}^{2+}$  content.

$\text{Ca}^{2+}$  buffer curves were constructed by plotting the change in total  $\text{Ca}^{2+}$ , calculated from the  $I_{\text{NCX}}$  integral, as a function of the change in free  $\text{Ca}^{2+}$ , measured from the caffeine evoked  $\text{Ca}^{2+}$  transient and were fit with a hyperbolic function (equation 1; Figure 5F). In the newborn the buffer curve was shifted to the left, indicative of an increase in  $\text{Ca}^{2+}$  buffering which decreased to adult levels by 3 months (Figure 5F). The affinity of buffers for  $\text{Ca}^{2+}$  ( $K_d$ ) was unchanged during development (Figure 5G;  $p=0.41$ ) but maximum buffering capacity ( $B_{\text{max}}$ ) was high in the newborn and decreased at 3 months and adult (Figure 5H;  $p < 0.01$ ). Buffer power, calculated using  $K_d$  and  $B_{\text{max}}$  in equation 2 as previously published [33], was also high in the newborn and decreased at 3 months and adulthood (Figure 5I,  $p < 0.05$ ). Decreased  $\text{Ca}^{2+}$  buffering requires a smaller change in total  $\text{Ca}^{2+}$  to produce the same change in free  $\text{Ca}^{2+}$  and could therefore play a role in the lack of change in  $\text{Ca}^{2+}$  transient amplitude despite decreases in  $I_{\text{Ca-L}}$  and SR  $\text{Ca}^{2+}$  content during development. To remove effects of  $\text{Ca}^{2+}$  buffering we next examined the properties of the total  $\text{Ca}^{2+}$  transient to determine the contribution of  $\text{Ca}^{2+}$  buffering in setting the properties of the systolic  $\text{Ca}^{2+}$  transient.

### 3.7 Decreased $\text{Ca}^{2+}$ buffering maintains the amplitude of the systolic $\text{Ca}^{2+}$ transient during development

The mean total  $\text{Ca}^{2+}$  transient at each developmental time point is shown in Figure 6A. It is evident that the amplitude of the total  $\text{Ca}^{2+}$  transient decreases from newborn to 3 months and adult consistent with decreases in  $I_{\text{Ca-L}}$  and SR  $\text{Ca}^{2+}$  content suggesting it is the decrease in  $\text{Ca}^{2+}$  buffering

which maintains the free  $\text{Ca}^{2+}$  transient during development. Similarly to the rate of decay of free  $\text{Ca}^{2+}$ , the rate of decay of total  $\text{Ca}^{2+}$  was unaltered during development (Figure 6Aiii). However, the abundance of SERCA and the ratio between SERCA and phospholamban (PLN) decreased during development suggesting other factors play a role.

#### 4. Discussion

In this study we show that the time course for postnatal t-tubule development and  $\text{Ca}^{2+}$  handling changes in the atria is in stark contrast to that in the ventricle. We found that when t-tubules are sparse in early life, increased  $I_{\text{Ca-L}}$  and SR load help maintain the  $\text{Ca}^{2+}$  transient by overcoming increased intracellular  $\text{Ca}^{2+}$  buffering. As the atrium matures postnatally, t-tubules adopt a specialist developmental state characterized by increased t-tubule density and complexity. Through the transition to adulthood, greater triggered  $\text{Ca}^{2+}$  release mediated by increased t-tubule density and decreased  $\text{Ca}^{2+}$  buffering permits maintenance of  $\text{Ca}^{2+}$  transient amplitude despite reduced  $I_{\text{Ca-L}}$  and SR load.

##### 4.1 Cardiac growth is accelerated in the early postnatal period and the adult phenotype is attained at 3 months of age

Accelerated cardiac growth was observed in the early postnatal period, indicated by HW:BW. This has been previously reported in multiple species[50, 51] and is facilitated by hyperplastic followed by hypertrophic growth. The trigger for this has not been fully defined but is attributed to increased arterial pressure[52] and hormone changes[53, 54] amongst others. Little is currently known about hypertrophic growth in the atria, but the switch to terminal differentiation in the ventricle appears to be species-dependent, occurring *in utero* in human and postpartum in rodents[20, 55]. As some binucleated atrial cells were present in the neonate this indicates this switch begins in utero as in the ventricle; though as 80% of sheep ventricular myocytes are binucleated at birth[48] this suggests chamber differences in gross maturation. Indeed, as increases in binucleation, cell size, capacitance and volume continued to be observed during development it is possible that there is a slower rate of growth in the atria vs ventricle.

Interestingly, the plateauing of changes in HW:BW ratio at 3 months coincides with maximal t-tubule density being attained. Since the function of t-tubules is to facilitate triggered  $\text{Ca}^{2+}$  release throughout the cell, it is perhaps unsurprising that t-tubules are *in situ* for the period of hypertrophic growth.

##### 4.2 Atrial t-tubules enter a specialist state during development

In contrast to small mammalian species [15-18, 21], we and others have previously shown the presence of t-tubules in foetal and newborn sheep[9, 19] and human foetal [20] ventricles. The presence of t-tubules at birth may be dependent on gestation period and developmental maturity with the time course for t-tubule formation shifted but the process and subsequent maturation of EC coupling appearing similar between species. This may be correlated with the shift from hyperplastic to hypertrophic growth previously discussed and is suggested to be associated with changes in cortisol and thyroid hormone that occur *in utero* in large mammals[53, 54]. This is supported by glucocorticoid and thyroid hormones promoting t-tubule development in human-induced pluripotent stem cell-derived cardiac myocytes[56].

Despite differences in the time course for development, previous studies in the ventricle appear to show continual t-tubule formation into adulthood, with positive correlation between t-tubule density and cell size[15, 16, 19]. It is unclear as to whether this is true or if there is also an overshoot in t-ventricular tubule formation prior to adult, as in the atria, due to the limited time points studied.

Whilst this is unknown, our study presents a novel finding that t-tubule formation is not directly associated with changes in cell width despite adult atrial t-tubule density being positively correlated to cell width across species[3]. At present, the cause of this overshoot is unclear. Though we found no clear association with proteins known to be involved in t-tubule formation in the ventricle[2, 15, 19], our observed decrease in BIN1 expression is similar to that shown after postnatal day 15 in mice. Given the species differences in the time course for t-tubule development, this likely reiterates a role for BIN1 in early t-tubule formation with expression subsequently maintained in line with continued t-tubule turnover as evidenced by the presence of t-tubule stumps at all time points.

Whilst this warrants further investigation, it is interesting that the increased t-tubule density we observe at 3 months is due to differences in t-tubule structure not number. Compared to the ventricle[43], atrial t-tubule structures are more diverse and complex, with a number of non-uniform shapes observed. The reasons behind this are not understood but as atrial t-size and complexity are increased at 3 months, it is possible that the initial demand for t-tubule growth results in disordered structures that are trimmed and optimised for function in adult. Indeed, as CICR is not enhanced at 3 months despite increased t-tubule density, the t-tubule network appears relatively inefficient vs adult.

#### **4.3 $I_{Ca-L}$ and SR load maintain $Ca^{2+}$ transient amplitude in newborn to overcome increased $Ca^{2+}$ buffering and reduced coupling with the SR**

In contrast to the ventricle where  $I_{Ca-L}$  increases with t-tubule maturation[15, 24, 26],  $I_{Ca-L}$  in the atria was maximal in the neonate when t-tubules were sparse. Whilst  $I_{Ca-L}$  is concentrated on t-tubules in the adult ventricle[57], there is even distribution on the surface and t-tubules in the atria[58] which may contribute to the disparity observed between chambers during development. Despite this, the increased newborn  $I_{Ca-L}$  should act as a greater trigger for SR release[36], yet alongside increased SR load we found no difference in systolic  $Ca^{2+}$  transient amplitude. We have shown this previously [9] and it has also been shown in the human atria[59], in contrast to studies in the ventricle where the amplitude of the transient increases postnatally[15, 17], despite reports of increased SR load in early life[60]. This preservation of atrial  $Ca^{2+}$  transient amplitude indicates atrial function is important throughout development, and may be compensatory for reduced ventricular relaxation that has been reported in early life[61-63]. As the atria contribute 25% to ventricular filling[64], it is possible that they may play a key role in ensuring cardiac output is maintained in the neonate and sustained into adulthood.

As indicated in our study, functional SR stores exist in the neonate human atria but that the efficiency of release increases with age, likely as t-tubules develop[59]. We have previously shown RyR clusters are aligned at the z-line from birth and are enlarged compared to adult [9]. Given fewer t-tubules in early life leave SR in the cell centre uncoupled, reduced triggered central  $Ca^{2+}$  release may not only contribute to the unaltered  $Ca^{2+}$  transient we observe but also to the increased SR load, along with increased  $Ca^{2+}$  influx[65] and SERCA:PLN expression. In the neonate rabbit ventricle reverse-mode operation of NCX compensates for both reduced  $I_{Ca-L}$  and SR coupling[27-30]. As we saw increased  $I_{Ca-L}$  in the neonate atria we suggest that the increased  $I_{NCX}$  we also observed is reflective of increased operation in forward-mode to ensure efflux equals influx.

Alongside reduced coupling with the SR, we attribute unaltered  $Ca^{2+}$  transient amplitude to increased buffering. As previously discussed in [33, 41], 99% of cytosolic  $Ca^{2+}$  is bound to intracellular buffers. With buffering increased in the neonate, a greater amount of total  $Ca^{2+}$  is required to generate a rise in free  $Ca^{2+}$  similar to adult. We found no difference in buffer  $K_d$  in the study but increased  $B_{max}$  indicating the endogenous buffers are consistent throughout development, but that expression is increased in the newborn. This could be attributed to the greater SERCA expression we observed in

early life or potential changes in troponin that have not been examined here[66]. Whilst increased buffering alone could account for the lack of change in  $\text{Ca}^{2+}$  transient amplitude, it may also exacerbate impaired CICR due to reduced coupling in early life as it limits propagation that is required to facilitate central  $\text{Ca}^{2+}$  release in the absence of a developed t-tubule network[67].

Comparisons are often made between the neonate and the failing heart to understand how myocytes can function with reduced t-tubule density in health but not disease. We and others show efficient  $I_{\text{Ca-L}}$  coupling despite immature t-tubules in early life, with improved coupling with SR throughout the cell as t-tubules develop[15, 18]. In HF, t-tubule loss in the ventricle results in a return to impaired central  $\text{Ca}^{2+}$  release, however EC coupling is also diminished at structurally coupled sites that are functional in the neonate[18]. Though no direct comparisons have been made between the neonate and HF atria in this study, it is likely that t-tubule remodelling is compounded by other factors resulting in impaired CICR in failing atrial cells. This may include the observed reduced  $I_{\text{Ca-L}}$  triggering less  $\text{Ca}^{2+}$  release even from SR close to the surface[13, 36], and a possible role for remodelling of RyRs[18, 68].

#### **4.5 Conclusions**

Our data shows that when t-tubules are sparse in the newborn atria, myocytes are specially adapted to maintain  $\text{Ca}^{2+}$  transient amplitude with increased  $I_{\text{Ca-L}}$  and SR load compensating for increased buffering. Despite reductions in  $I_{\text{Ca-L}}$  and SR load with age,  $\text{Ca}^{2+}$  transient amplitude is maintained due to increased t-tubule density, triggered central  $\text{Ca}^{2+}$  release and reduced  $\text{Ca}^{2+}$  buffering. Given the preservation of the  $\text{Ca}^{2+}$  transient ensures maintained atrial function, the neonate atria can provide insights into adaptations in  $\text{Ca}^{2+}$  cycling to negate reduced t-tubule density that occurs in HF.

#### **Author Contributions**

All authors contributed to the delivery of experiments/data analysis. KMD, AWT and DAE obtained funding and were responsible for the experimental concept. CERS and KMD wrote the manuscript, and all authors contributed to manuscript editing.

#### **Disclosures**

None.

#### **Funding**

This work was supported by research grants from The British Heart Foundation (FS/09/002/26487, FS/14/4/30532, PG/18/24/33608, IG/15/2/31514, FS/16/58/32734).

#### **Acknowledgments**

The authors thank the staff in the FBMH EM Core Facility for their assistance and the Wellcome Trust for equipment grant support to the EM Facility.

## References

- [1] F. Brette, C. Orchard, T-tubule function in mammalian cardiac myocytes, *Circ Res* 92(11) (2003) 1182-92.
- [2] J.L. Caldwell, C.E. Smith, R.F. Taylor, A. Kitmitto, D.A. Eisner, K.M. Dibb, A.W. Trafford, Dependence of cardiac transverse tubules on the BAR domain protein amphiphysin II (BIN-1), *Circ Res* 115(12) (2014) 986-96.
- [3] M.A. Richards, J.D. Clarke, P. Saravanan, N. Voigt, D. Dobrev, D.A. Eisner, A.W. Trafford, K.M. Dibb, Transverse tubules are a common feature in large mammalian atrial myocytes including human, *American journal of physiology. Heart and circulatory physiology* 301(5) (2011) H1996-2005.
- [4] M. Frisk, J.T. Koivumaki, P.A. Norseng, M.M. Maleckar, O.M. Sejersted, W.E. Louch, Variable t-tubule organization and Ca<sup>2+</sup> homeostasis across the atria, *American journal of physiology. Heart and circulatory physiology* 307(4) (2014) H609-20.
- [5] K.M. Dibb, J.D. Clarke, M.A. Horn, M.A. Richards, H.K. Graham, D.A. Eisner, A.W. Trafford, Characterization of an extensive transverse tubular network in sheep atrial myocytes and its depletion in heart failure, *Circulation. Heart failure* 2(5) (2009) 482-9.
- [6] I. Lenaerts, V. Bito, F.R. Heinzel, R.B. Driesen, P. Holemans, J. D'hooge, H. Heidbüchel, K.R. Sipido, R. Willems, Ultrastructural and Functional Remodeling of the Coupling Between Ca<sup>2+</sup> Influx and Sarcoplasmic Reticulum Ca<sup>2+</sup> Release in Right Atrial Myocytes From Experimental Persistent Atrial Fibrillation, *Circ Res* 105(9) (2009) 876-885.
- [7] H.C. Gadeberg, R.C. Bond, C.H.T. Kong, G.P. Chanoit, R. Ascione, M.B. Cannell, A.F. James, Heterogeneity of T-Tubules in Pig Hearts, *PLOS ONE* 11(6) (2016) e0156862.
- [8] C.E.R. Smith, A.W. Trafford, J.L. Caldwell, K.M. Dibb, Physiology and patho-physiology of the cardiac transverse tubular system, *Current Opinion in Physiology* 1 (2018) 153-160.
- [9] C.E.R. Smith, C. Pinali, D.A. Eisner, A.W. Trafford, K.M. Dibb, Enhanced calcium release at specialised surface sites compensates for reduced t-tubule density in neonatal sheep atrial myocytes, *Journal of Molecular and Cellular Cardiology* 173 (2022) 61-70.
- [10] S.J. Briston, J.L. Caldwell, M.A. Horn, J.D. Clarke, M.A. Richards, D.J. Greensmith, H.K. Graham, M.C. Hall, D.A. Eisner, K.M. Dibb, A.W. Trafford, Impaired beta-adrenergic responsiveness accentuates dysfunctional excitation-contraction coupling in an ovine model of tachypacing-induced heart failure, *The Journal of physiology* 589(Pt 6) (2011) 1367-82.
- [11] M. Lawless, J.L. Caldwell, E.J. Radcliffe, C.E.R. Smith, G.W.P. Madders, D.C. Hutchings, L.S. Woods, S.J. Church, R.D. Unwin, G.J. Kirkwood, L.K. Becker, C.M. Pearman, R.F. Taylor, D.A. Eisner, K.M. Dibb, A.W. Trafford, Phosphodiesterase 5 inhibition improves contractile function and restores transverse tubule loss and catecholamine responsiveness in heart failure, *Scientific reports* 9(1) (2019) 6801.
- [12] J.-Q. He, M.W. Conklin, J.D. Foell, M.R. Wolff, R.A. Haworth, R. Coronado, T.J. Kamp, Reduction in density of transverse tubules and L-type Ca<sup>2+</sup> channels in canine tachycardia-induced heart failure, *Cardiovascular research* 49(2) (2001) 298-307.
- [13] J.D. Clarke, J.L. Caldwell, M.A. Horn, E.F. Bode, M.A. Richards, M.C. Hall, H.K. Graham, S.J. Briston, D.J. Greensmith, D.A. Eisner, K.M. Dibb, A.W. Trafford, Perturbed atrial calcium handling in an ovine model of heart failure: potential roles for reductions in the L-type calcium current, *J Mol Cell Cardiol* 79 (2015) 169-79.
- [14] T.T. Phan, K. Abozguia, G.N. Shivu, I. Ahmed, F. Leyva, K. Patel, M. Frenneaux, Increased atrial contribution to left ventricular filling compensates for impaired early filling during exercise in heart failure with preserved ejection fraction, *Journal of cardiac failure* 15(10) (2009) 890-7.
- [15] A.P. Ziman, N.L. Gomez-Viquez, R.J. Bloch, W.J. Lederer, Excitation-contraction coupling changes during postnatal cardiac development, *J Mol Cell Cardiol* 48(2) (2010) 379-86.
- [16] P.S. Haddock, W.A. Coetzee, E. Cho, L. Porter, H. Katoh, D.M. Bers, M.S. Jafri, M. Artman, Subcellular [Ca<sup>2+</sup>]<sub>i</sub> gradients during excitation-contraction coupling in newborn rabbit ventricular myocytes, *Circ Res* 85(5) (1999) 415-27.



- [17] S. Hamaguchi, Y. Kawakami, Y. Honda, K. Nemoto, A. Sano, I. Namekata, H. Tanaka, Developmental changes in excitation-contraction mechanisms of the mouse ventricular myocardium as revealed by functional and confocal imaging analyses, *Journal of pharmacological sciences* 123(2) (2013) 167-75.
- [18] D.B. Lipsett, M. Frisk, J.M. Aronsen, E.S. Nordén, O.R. Buonarati, A. Cataliotti, J.W. Hell, I. Sjaastad, G. Christensen, W.E. Louch, Cardiomyocyte substructure reverts to an immature phenotype during heart failure, *The Journal of physiology* 597(7) (2019) 1833-1853.
- [19] M.L. Munro, C. Soeller, Early transverse tubule development begins in utero in the sheep heart, *Journal of muscle research and cell motility* (2017).
- [20] H.D. Kim, D.J. Kim, I.J. Lee, B.J. Rah, Y. Sawa, J. Schaper, Human fetal heart development after mid-term: morphometry and ultrastructural study, *J Mol Cell Cardiol* 24(9) (1992) 949-65.
- [21] H. Perdreau-Dahl, D.B. Lipsett, M. Frisk, F. Kermani, C.R. Carlson, A. Brech, X. Shen, A. Bergan-Dahl, Y. Hou, T. Tuomainen, P. Tavi, P.P. Jones, M. Lunde, J.A. Wasserstrom, J. Laporte, N.D. Ullrich, G. Christensen, J.P. Morth, W.E. Louch, BIN1, Myotubularin, and Dynamin-2 Coordinate T-Tubule Growth in Cardiomyocytes, *Circ Res* 132(11) (2023) e188-e205.
- [22] F. Sedarat, L. Xu, E.D. Moore, G.F. Tibbits, Colocalization of dihydropyridine and ryanodine receptors in neonate rabbit heart using confocal microscopy, *American journal of physiology. Heart and circulatory physiology* 279(1) (2000) H202-9.
- [23] Y. Kato, H. Masumiya, N. Agata, H. Tanaka, K. Shigenobu, Developmental changes in action potential and membrane currents in fetal, neonatal and adult guinea-pig ventricular myocytes, *J Mol Cell Cardiol* 28(7) (1996) 1515-22.
- [24] T.V. Huynh, F. Chen, G.T. Wetzel, W.F. Friedman, T.S. Klitzner, Developmental changes in membrane Ca<sup>2+</sup> and K<sup>+</sup> currents in fetal, neonatal, and adult rabbit ventricular myocytes, *Circ Res* 70(3) (1992) 508-15.
- [25] S. Seki, M. Nagashima, Y. Yamada, M. Tsutsuura, T. Kobayashi, A. Namiki, N. Tohse, Fetal and postnatal development of Ca<sup>2+</sup> transients and Ca<sup>2+</sup> sparks in rat cardiomyocytes, *Cardiovascular research* 58(3) (2003) 535-48.
- [26] G.T. Wetzel, F. Chen, T.S. Klitzner, Ca<sup>2+</sup> channel kinetics in acutely isolated fetal, neonatal, and adult rabbit cardiac myocytes, *Circulation Research* 72(5) (1993) 1065-1074.
- [27] P.S. Haddock, W.A. Coetzee, M. Artman, Na<sup>+</sup>/Ca<sup>2+</sup> exchange current and contractions measured under Cl(-)-free conditions in developing rabbit hearts, *American Journal of Physiology - Heart and Circulatory Physiology* 273(2) (1997) H837-H846.
- [28] G.T. Wetzel, F. Chen, T.S. Klitzner, Na<sup>+</sup>/Ca<sup>2+</sup> exchange and cell contraction in isolated neonatal and adult rabbit cardiac myocytes, *American Journal of Physiology - Heart and Circulatory Physiology* 268(4) (1995) H1723-H1733.
- [29] J. Huang, L. Hove-Madsen, G.F. Tibbits, Ontogeny of Ca<sup>2+</sup>-induced Ca<sup>2+</sup> release in rabbit ventricular myocytes, *American Journal of Physiology - Cell Physiology* 294(2) (2008) C516-C525.
- [30] D. Balaguru, P.S. Haddock, J.L. Puglisi, D.M. Bers, W.A. Coetzee, M. Artman, Role of the sarcoplasmic reticulum in contraction and relaxation of immature rabbit ventricular myocytes, *J Mol Cell Cardiol* 29(10) (1997) 2747-57.
- [31] A.L. Escobar, R. Ribeiro-Costa, C. Villalba-Galea, M.E. Zoghbi, C.G. Perez, R. Mejia-Alvarez, Developmental changes of intracellular Ca<sup>2+</sup> transients in beating rat hearts, *American journal of physiology. Heart and circulatory physiology* 286(3) (2004) H971-8.
- [32] M.A. Horn, E.F. Bode, S.J. Borland, G.J. Kirkwood, S.J. Briston, M.A. Richards, K.M. Dibb, A.W. Trafford, Temporal Development of Autonomic Dysfunction in Heart Failure: Effects of Age in an Ovine Rapid-pacing Model, *The journals of gerontology. Series A, Biological sciences and medical sciences* 71(12) (2016) 1544-1552.
- [33] J.D. Clarke, J.L. Caldwell, C.M. Pearman, D.A. Eisner, A.W. Trafford, K.M. Dibb, Increased Ca buffering underpins remodelling of Ca(2+) handling in old sheep atrial myocytes, *The Journal of physiology* 595(19) (2017) 6263-6279.



- [34] H.K. Graham, A.W. Trafford, Spatial disruption and enhanced degradation of collagen with the transition from compensated ventricular hypertrophy to symptomatic congestive heart failure, *American journal of physiology. Heart and circulatory physiology* 292(3) (2007) H1364-72.
- [35] A.P. Walden, K.M. Dibb, A.W. Trafford, Differences in intracellular calcium homeostasis between atrial and ventricular myocytes, *J Mol Cell Cardiol* 46(4) (2009) 463-73.
- [36] K.M. Dibb, U. Rueckschloss, D.A. Eisner, G. Isenberg, A.W. Trafford, Mechanisms underlying enhanced cardiac excitation contraction coupling observed in the senescent sheep myocardium, *J Mol Cell Cardiol* 37(6) (2004) 1171-81.
- [37] M.E. Díaz, H.K. Graham, A.W. Trafford, Enhanced sarcolemmal Ca<sup>2+</sup> efflux reduces sarcoplasmic reticulum Ca<sup>2+</sup> content and systolic Ca<sup>2+</sup> in cardiac hypertrophy, *Cardiovascular research* 62(3) (2004) 538-47.
- [38] H. Satoh, L.M. Delbridge, L.A. Blatter, D.M. Bers, Surface:volume relationship in cardiac myocytes studied with confocal microscopy and membrane capacitance measurements: species-dependence and developmental effects, *Biophysical journal* 70(3) (1996) 1494-504.
- [39] A. Varro, N. Negretti, S.B. Hester, D.A. Eisner, An estimate of the calcium content of the sarcoplasmic reticulum in rat ventricular myocytes, *Pflügers Archiv* 423(1) (1993) 158-160.
- [40] M.E. Díaz, A.W. Trafford, D.A. Eisner, The role of intracellular Ca buffers in determining the shape of the systolic Ca transient in cardiac ventricular myocytes, *Pflugers Archiv : European journal of physiology* 442(1) (2001) 96-100.
- [41] A.W. Trafford, M.E. Díaz, D.A. Eisner, A novel, rapid and reversible method to measure Ca buffering and time-course of total sarcoplasmic reticulum Ca content in cardiac ventricular myocytes, *Pflugers Archiv : European journal of physiology* 437(3) (1999) 501-3.
- [42] S.A. Wilke, J.K. Antonios, E.A. Bushong, A. Badkoobehi, E. Malek, M. Hwang, M. Terada, M.H. Ellisman, A. Ghosh, Deconstructing complexity: serial block-face electron microscopic analysis of the hippocampal mossy fiber synapse, *The Journal of neuroscience : the official journal of the Society for Neuroscience* 33(2) (2013) 507-22.
- [43] C. Pinali, H. Bennett, J.B. Davenport, A.W. Trafford, A. Kitmitto, Three-dimensional reconstruction of cardiac sarcoplasmic reticulum reveals a continuous network linking transverse-tubules: this organization is perturbed in heart failure, *Circ Res* 113(11) (2013) 1219-30.
- [44] C. Pinali, H.J. Bennett, J.B. Davenport, J.L. Caldwell, T. Starborg, A.W. Trafford, A. Kitmitto, Three-dimensional structure of the intercalated disc reveals plicate domain and gap junction remodeling in heart failure, *Biophysical journal* 108(3) (2015) 498-507.
- [45] J.R. Kremer, D.N. Mastronarde, J.R. McIntosh, Computer visualization of three-dimensional image data using IMOD, *Journal of structural biology* 116(1) (1996) 71-6.
- [46] S.S. Jonker, S. Louey, G.D. Giraud, K.L. Thornburg, J.J. Faber, Timing of cardiomyocyte growth, maturation, and attrition in perinatal sheep, *FASEB journal : official publication of the Federation of American Societies for Experimental Biology* 29(10) (2015) 4346-57.
- [47] K.J. Botting, K.C.W. Wang, M. Padhee, I.C. McMillen, B. Summers-Pearce, L. Rattanatrav, N. Cutri, G.S. Posterino, D.A. Brooks, J.L. Morrison, Early origins of heart disease: Low birth weight and determinants of cardiomyocyte endowment, *Clinical and Experimental Pharmacology and Physiology* 39(9) (2012) 814-823.
- [48] J.H. Burrell, A.M. Boyn, V. Kumarasamy, A. Hsieh, S.I. Head, E.R. Lumbers, Growth and maturation of cardiac myocytes in fetal sheep in the second half of gestation, *The Anatomical Record Part A: Discoveries in Molecular, Cellular, and Evolutionary Biology* 274A(2) (2003) 952-961.
- [49] Y. Qu, D.L. Campbell, Modulation of L-type calcium current kinetics by sarcoplasmic reticulum calcium release in ferret isolated right ventricular myocytes, *Can J Cardiol* 14(2) (1998) 263-72.
- [50] P. Anversa, G. Olivetti, A.V. Loud, Morphometric study of early postnatal development in the left and right ventricular myocardium of the rat. I. Hypertrophy, hyperplasia, and binucleation of myocytes, *Circulation Research* 46(4) (1980) 495-502.
- [51] E.W. House, H.E. Ederstrom, Anatomical changes with age in the heart and ductus arteriosus in the dog after birth, *The Anatomical Record* 160(2) (1968) 289-295.

- [52] S.S. Jonker, J.J. Faber, D.F. Anderson, K.L. Thornburg, S. Louey, G.D. Giraud, Sequential growth of fetal sheep cardiac myocytes in response to simultaneous arterial and venous hypertension, *American journal of physiology. Regulatory, integrative and comparative physiology* 292(2) (2007) R913-9.
- [53] E.R. Lumbers, A.C. Boyce, G. Joulianos, V. Kumarasamy, E. Barner, J.L. Segar, J.H. Burrell, Effects of cortisol on cardiac myocytes and on expression of cardiac genes in fetal sheep, *American Journal of Physiology - Regulatory, Integrative and Comparative Physiology* 288(3) (2005) R567-R574.
- [54] N.N. Chattergoon, G.D. Giraud, S. Louey, P. Stork, A.L. Fowden, K.L. Thornburg, Thyroid hormone drives fetal cardiomyocyte maturation, *The FASEB Journal* 26(1) (2012) 397-408.
- [55] F. Li, X. Wang, J.M. Capasso, A.M. Gerdes, Rapid transition of cardiac myocytes from hyperplasia to hypertrophy during postnatal development, *J Mol Cell Cardiol* 28(8) (1996) 1737-46.
- [56] S.S. Parikh, D.J. Blackwell, N. Gomez-Hurtado, M. Frisk, L. Wang, K. Kim, C.P. Dahl, A. Fiane, T. Tønnessen, D.O. Kryshtal, W.E. Louch, B.C. Knollmann, Thyroid and Glucocorticoid Hormones Promote Functional T-Tubule Development in Human-Induced Pluripotent Stem Cell-Derived Cardiomyocytes, *Circ Res* 121(12) (2017) 1323-1330.
- [57] M. Kawai, M. Hussain, C.H. Orchard, Excitation-contraction coupling in rat ventricular myocytes after formamide-induced detubulation, *The American journal of physiology* 277(2 Pt 2) (1999) H603-9.
- [58] A.V. Glukhov, M. Balycheva, J.L. Sanchez-Alonso, Z. Ilkan, A. Alvarez-Laviada, N. Bhogal, I. Diakonov, S. Schobesberger, M.B. Sikkell, A. Bhargava, G. Faggian, P.P. Punjabi, S.R. Houser, J. Gorelik, Direct Evidence for Microdomain-Specific Localization and Remodeling of Functional L-Type Calcium Channels in Rat and Human Atrial Myocytes, *Circulation* 132(25) (2015) 2372-84.
- [59] S.N. Hatem, T. Sweeten, V. Vetter, M. Morad, Evidence for presence of Ca<sup>2+</sup> channel-gated Ca<sup>2+</sup> stores in neonatal human atrial myocytes, *American Journal of Physiology - Heart and Circulatory Physiology* 268(3 37-3) (1995) H1195-H1201.
- [60] J. Huang, L. Hove-Madsen, G.F. Tibbits, Na<sup>+</sup>/Ca<sup>2+</sup> exchange activity in neonatal rabbit ventricular myocytes, *American journal of physiology. Cell physiology* 288(1) (2005) C195-203.
- [61] A. Kozák-Bárány, E. Jokinen, M. Saraste, J. Tuominen, I. Välimäki, Development of left ventricular systolic and diastolic function in preterm infants during the first month of life: A prospective follow-up study, *J Pediatr* 139(4) (2001) 539-545.
- [62] K.L. Reed, D.J. Sahn, S. Scagnelli, C.F. Anderson, L. Shenker, Doppler echocardiographic studies of diastolic function in the human fetal heart: changes during gestation, *Journal of the American College of Cardiology* 8(2) (1986) 391-5.
- [63] J.C. Veille, N. Smith, D. Zaccaro, Ventricular filling patterns of the right and left ventricles in normally grown fetuses: a longitudinal follow-up study from early intrauterine life to age 1 year, *American journal of obstetrics and gynecology* 180(4) (1999) 849-58.
- [64] R.J.M. Klautz, J. Baan, D.F. Teitel, Contribution of synchronized atrial systole to left ventricular contraction in the newborn pig heart, *Pediatr Res* 43(3) (1998) 331-337.
- [65] A. Fabiato, Simulated calcium current can both cause calcium loading in and trigger calcium release from the sarcoplasmic reticulum of a skinned canine cardiac Purkinje cell, *The Journal of general physiology* 85(2) (1985) 291-320.
- [66] S.J. Briston, K.M. Dibb, R.J. Solaro, D.A. Eisner, A.W. Trafford, Balanced changes in Ca buffering by SERCA and troponin contribute to Ca handling during  $\beta$ -adrenergic stimulation in cardiac myocytes, *Cardiovascular research* 104(2) (2014) 347-354.
- [67] L. Mackenzie, H.L. Roderick, M.J. Berridge, S.J. Conway, M.D. Bootman, The spatial pattern of atrial cardiomyocyte calcium signalling modulates contraction, *Journal of cell science* 117(Pt 26) (2004) 6327-37.
- [68] L.-S. Song, E.A. Sobie, S. McCulle, W.J. Lederer, C.W. Balke, H. Cheng, Orphaned ryanodine receptors in the failing heart, *Proc Natl Acad Sci U S A* 103(11) (2006) 4305-4310.

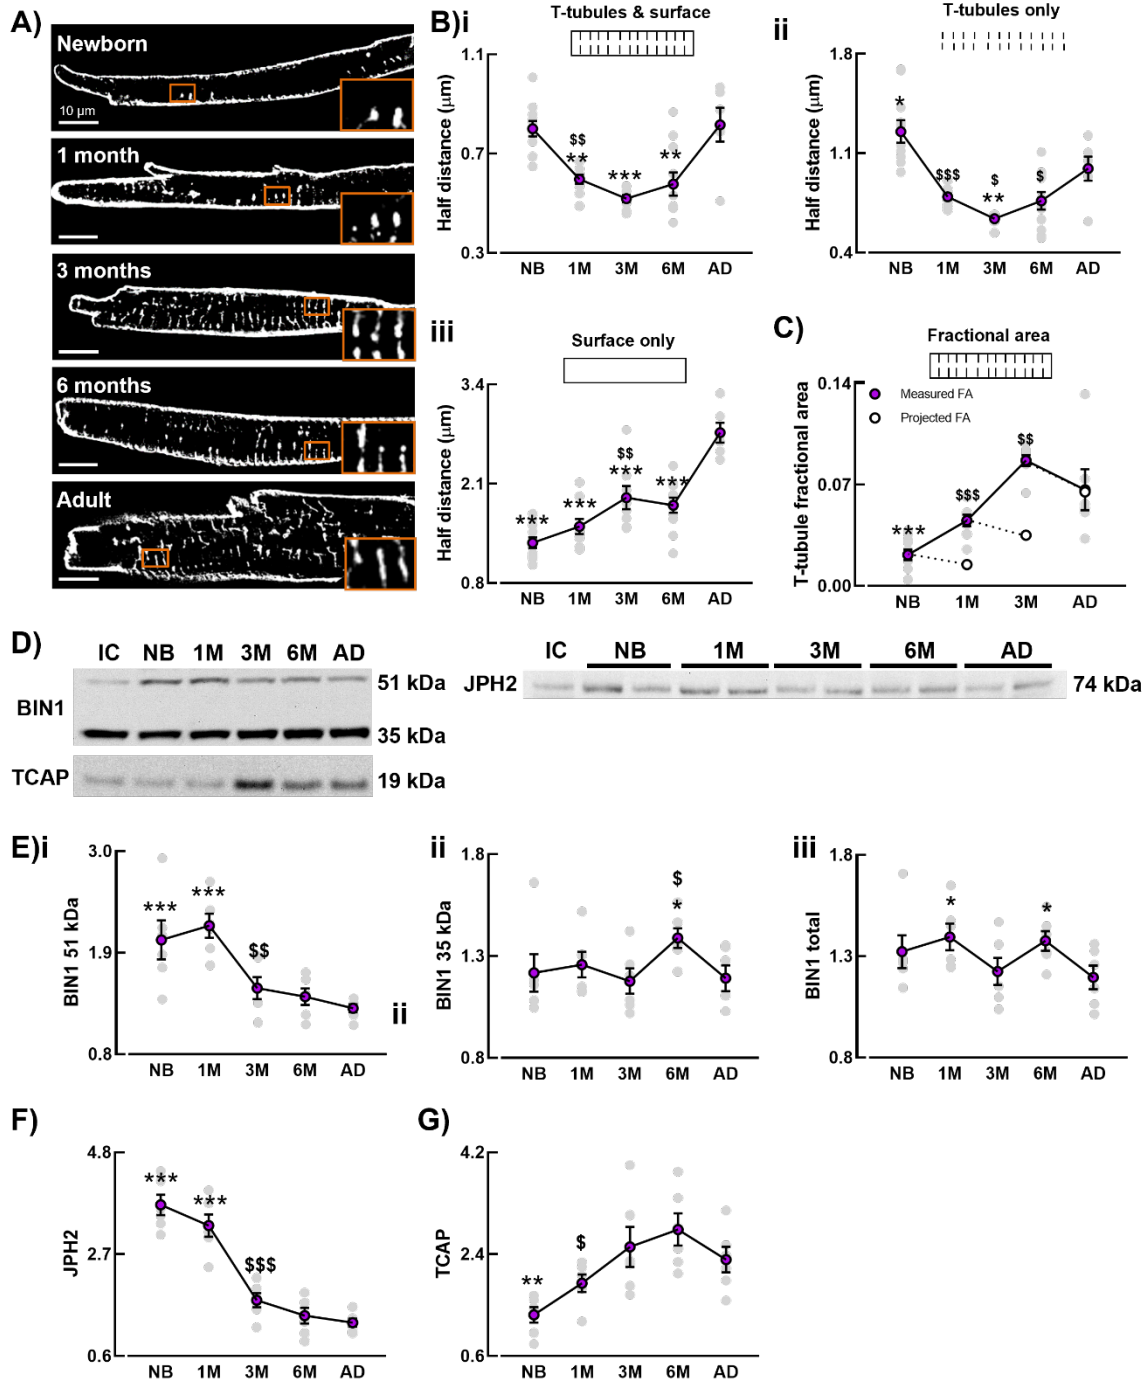

**Figure 1 – Developmental changes in atrial t-tubule density and expression of t-tubule regulatory proteins.** Representative images of t-tubule staining in atrial myocytes (A). Mean data for half distance to membrane (t-tubules and surface) (Bi), half distance to t-tubule membrane only (ii) and half distance to surface membrane only (iii). Mean and projected fractional area should cell size increase but no further t-tubule formation occurs between time points (C). Representative blots (D) and mean data for expression of BIN1 (E), JPH2 (F) and TCAP (G). B&C, n=37-58 cells/N=6-11 animals. E-G, N=6 animals, minimum 3 repeats. \*  $p < 0.05$ , \*\*  $p < 0.01$ , \*\*\*  $p < 0.001$  vs adult, \$  $p < 0.05$ , \$\$  $p < 0.01$ , \$\$\$  $p < 0.001$  vs previous time point, using linear mixed models analysis. Scale bars = 10  $\mu\text{m}$ .

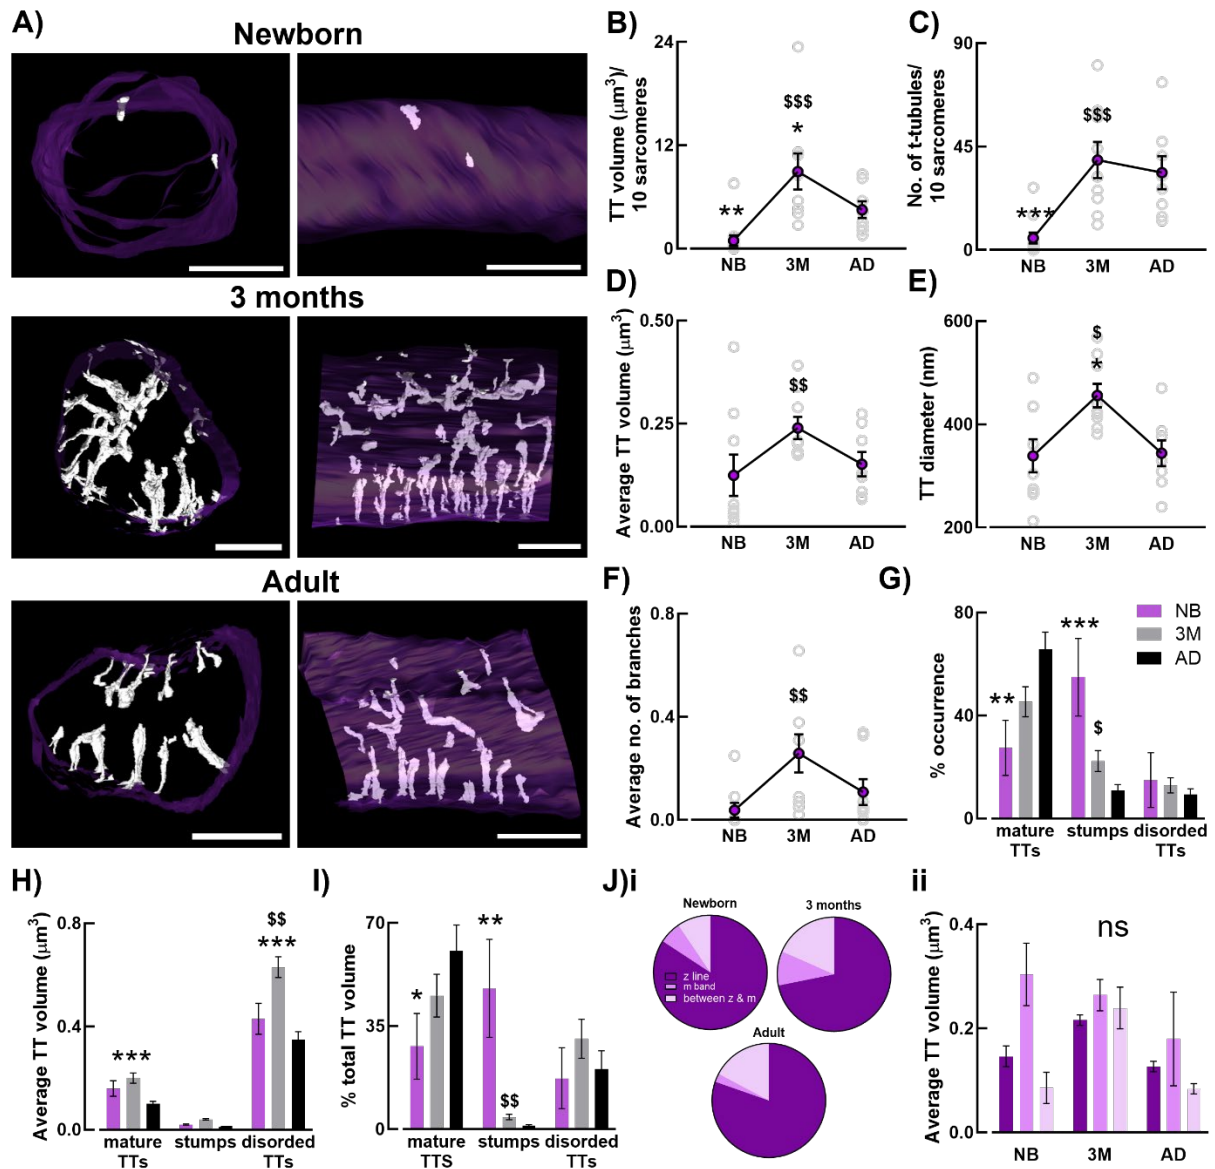

**Figure 2 – Developmental changes in t-tubule ultrastructure.** Representative electron microscopy reconstructions showing the surface sarcolemma (purple) and t-tubules (white) in newborn, 3 months and adult cells (A). Mean data showing t-tubule density (B), number of t-tubules per cell (C), average t-tubule volume (D), t-tubule diameter (E), and average number of branches (F). Mean data for % occurrence (G), average volume (H) and % of total t-tubule volume for t-tubule morphologies categorised as mature (column, intermediate and club), stumps or disordered (random, oak tree, longitudinal). Summary data for t-tubule origin (J) showing occurrence from the z line, m band or between (i) and t-tubule volume depending on origin (ii).  $n=8-12$  cells/ $N=3$  animals per group. \*  $p<0.05$ , \*\*  $p<0.01$ , \*\*\*  $p<0.001$  vs adult, \$  $p<0.05$ , \$\$  $p<0.01$ , \$\$\$  $p<0.001$  vs previous time point, using one way ANOVA or two way ANOVA where appropriate. Scale bars = 5  $\mu\text{m}$ .

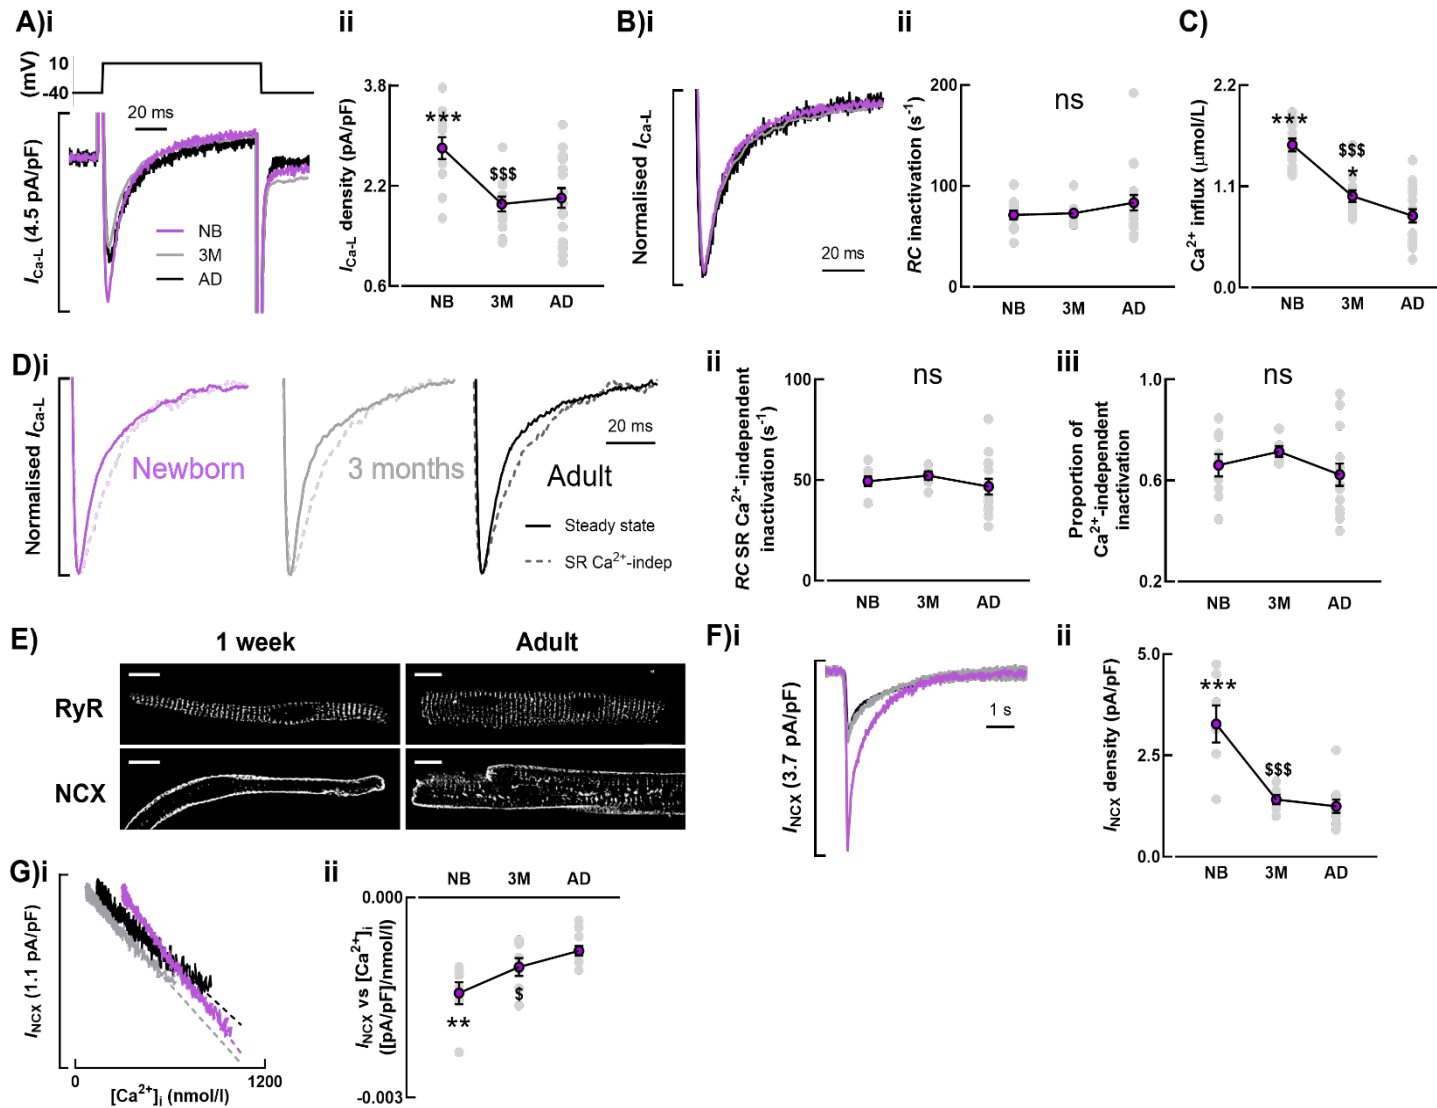

**Figure 3 – Developmental changes in  $I_{Ca-L}$  and  $I_{NCX}$ .** Representative traces for  $I_{Ca-L}$  density (Ai) and inactivation (Bi) from newborn, 3 month and adult cells. Mean data for  $I_{Ca-L}$  density (Aii), rate of inactivation (Bii) and  $Ca^{2+}$  influx via  $I_{Ca-L}$  (C). Representative  $I_{Ca-L}$  traces (Di) and mean data from steady state (full line) and following caffeine application (dotted line) showing the rate of  $Ca^{2+}$ -independent inactivation (Dii) and proportion of  $Ca^{2+}$ -independent inactivation (Diii). Representative images of RyR and NCX staining in newborn and adult cells (E). Representative traces for  $I_{NCX}$  density (Fi) and relationship between  $I_{NCX}$  and  $[Ca^{2+}]_i$  (Gi) obtained following application of 10 mM caffeine. Mean data showing  $I_{NCX}$  density (Fii) and slope of the relationship between  $I_{NCX}$  and  $[Ca^{2+}]_i$  (Gii). A-C, n=31-45 cells/N=13-19 animals. D, n=17-21 cells/N=6-13 animals. F&G, n=14-17 cells/N=7-11 animals. \*  $p < 0.05$ , \*\*  $p < 0.01$ , \*\*\*  $p < 0.001$  vs adult, \$  $p < 0.05$ , \$\$\$  $p < 0.001$  vs previous time point, using linear mixed models analysis. Scale bars = 10  $\mu m$ .

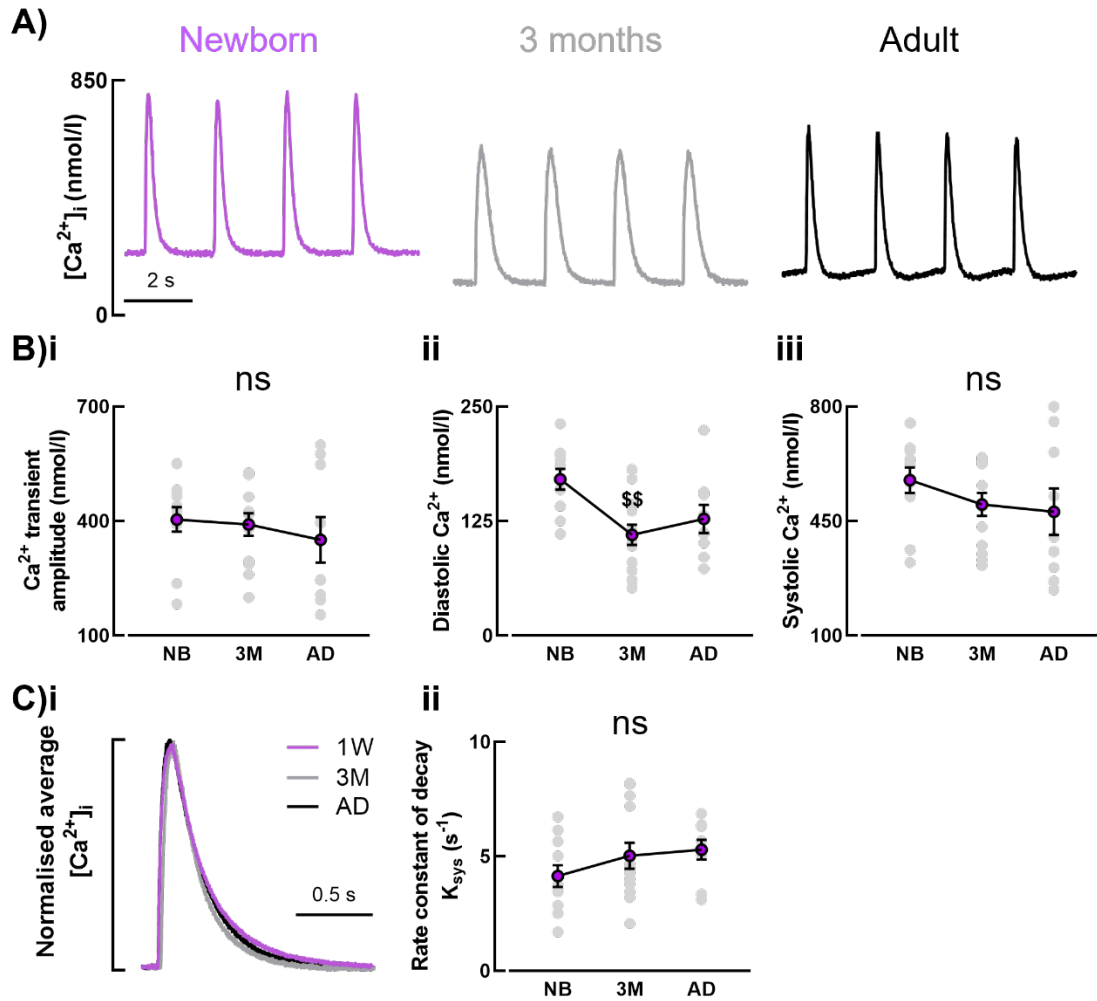

**Figure 4 – Developmental changes the systolic  $Ca^{2+}$  transient.** Representative  $Ca^{2+}$  transients from newborn, 3 months and adult (A). Mean data for amplitude (Bi), diastolic (ii) and systolic  $Ca^{2+}$  (iii). Normalised average  $Ca^{2+}$  transients (i) and mean data (ii) showing rate of decay of the transient (C). n=18-35 cells/N=11-14 animals.  $§§$   $p < 0.01$  vs previous time point, using linear mixed models analysis.



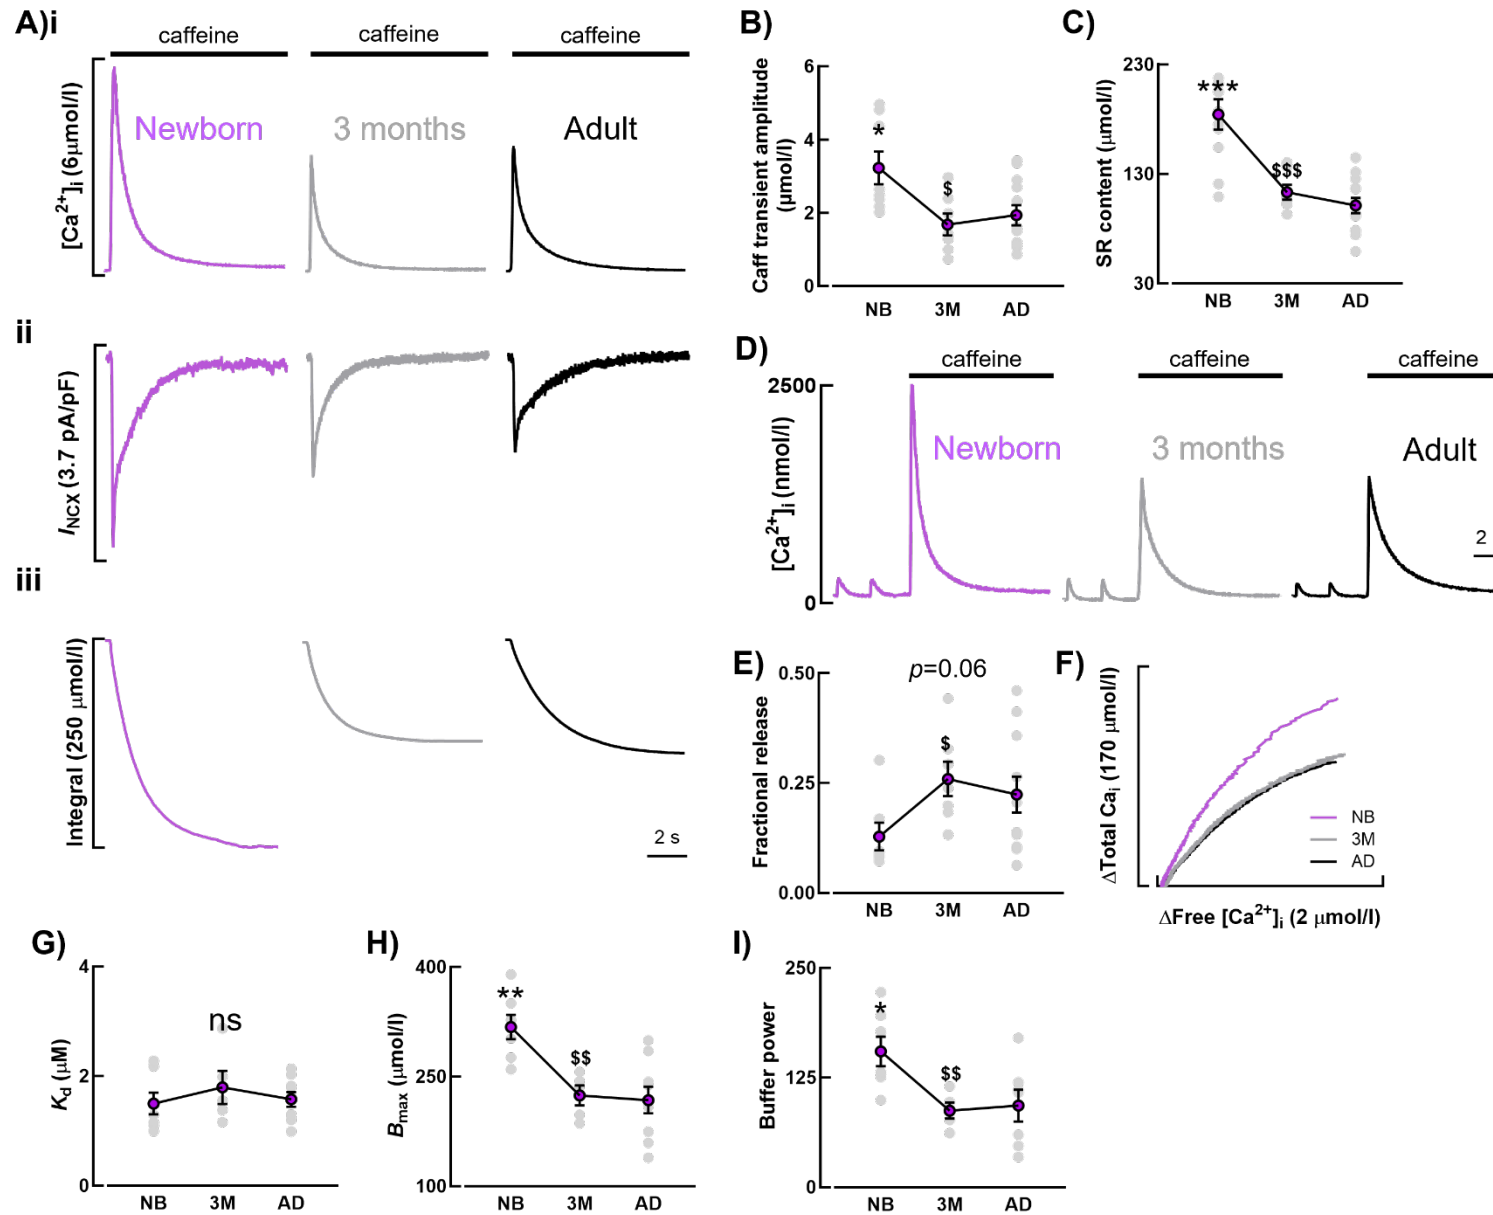

**Figure 5 – Developmental changes in SR load and  $Ca^{2+}$  buffering.** Example traces following application of 10 mM caffeine (A) showing the subsequent caffeine-evoked  $Ca^{2+}$  transient (i),  $I_{NCX}$  (ii), and integral of  $I_{NCX}$  used to determine SR content (iii). Mean data for caffeine transient amplitude (B) and SR content (C). Representative  $Ca^{2+}$  transients and caffeine-evoked transients from newborn, 3 months and adult (D) reflecting the mean data for fractional release (E). Representative buffer curves from newborn, 3 months and adult (F). Mean data for buffer affinity (G), max buffer capacity (H) and buffer power (I). B,  $n=15-18$  cells/ $N=7-12$  animals. C,  $n=19-29$  cells/ $N=7-13$  animals. E,  $n=14-16$  cells/ $N=7-11$  animals. G&H,  $n=10-14$  cells/ $N=5-9$  animals. I,  $n=8-13$ / $N=5-7$  animals. \*  $p < 0.05$ , \*\*  $p < 0.01$ , \*\*\*  $p < 0.001$  vs adult, \$  $p < 0.05$ , \$\$  $p < 0.01$ , \$\$\$  $p < 0.001$  vs previous time point, using linear mixed models analysis.



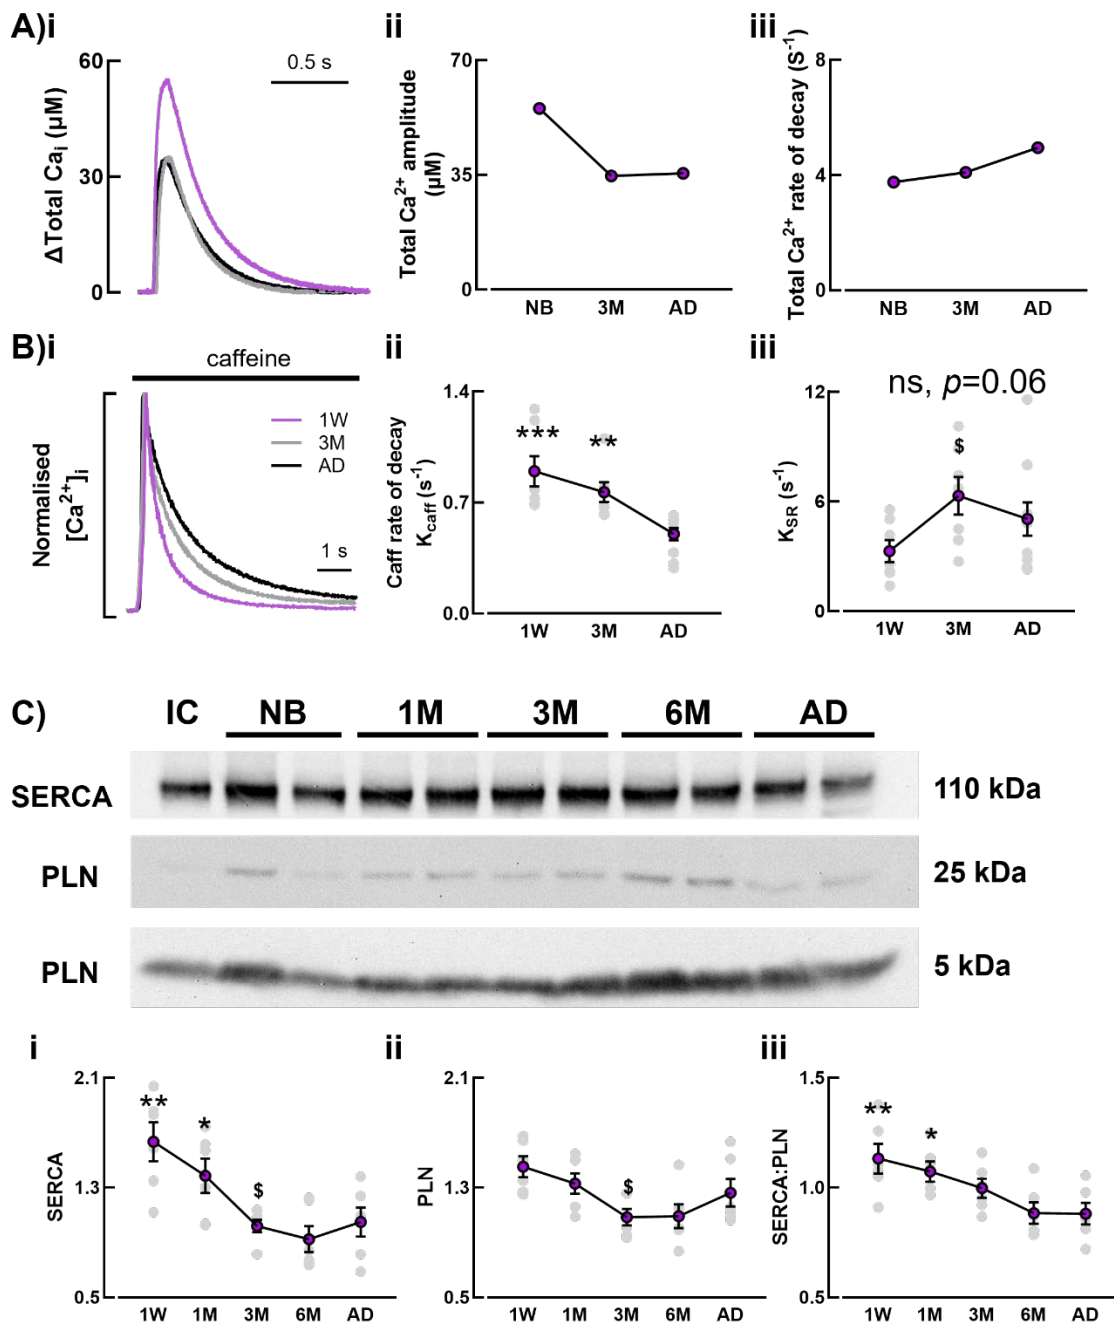

**Figure 6 – Decreased Ca buffering maintains the amplitude of the  $\text{Ca}^{2+}$  transient during development.** Ai) Mean total  $\text{Ca}^{2+}$  transients were generated from the mean free  $\text{Ca}^{2+}$  transient ( $n=18-35$  cells/ $N=11-14$  animals) using the average buffering parameters at each developmental time point and equation 1 ( $n=10-14$  cells/ $N=5-9$  animals). Ai-ii show the amplitude and rate of decay of the mean total  $\text{Ca}^{2+}$  transients in (Ai). The abundance of SERCA and PLN at each developmental time point was calculated by western blot. Typical membranes probed for SERCA and PLN (monomer and pentamer) are shown in Panel Bi-iii show how SERCA, PLN and the SERCA:PLN ratio change with development. B,  $n=13-16$  cells/ $7-10$  animals. C,  $N=6$  animals, minimum 3 repeats. \*  $p<0.05$ , \*\*  $p<0.01$ , \*\*\*  $p<0.001$  vs adult, \$  $p<0.05$  vs previous time point, using linear mixed models analysis.

| Time point | Cell length ( $\mu\text{m}$ ) | Cell volume (pL) | Raw peak $I_{\text{Ca-L}}$ (pA) |
|------------|-------------------------------|------------------|---------------------------------|
| Newborn    | 91.7 $\pm$ 3.2                | 4.6 $\pm$ 0.2    | 77.8 $\pm$ 7.4                  |
| 1 month    | 124.3 $\pm$ 11.8              | 9.4 $\pm$ 2.0    | 111.1 $\pm$ 10.4                |
| 3 months   | 132.2 $\pm$ 1.4               | 13.0 $\pm$ 0.7   | 135.4 $\pm$ 10.63               |
| Adult      | 133.9 $\pm$ 9.1               | 16.0 $\pm$ 2.3   | 136.6 $\pm$ 11.3                |
|            | *** $p < 0.001$               | *** $p < 0.001$  | *** $p < 0.001$                 |

**Supplemental Table 1 – Additional cell parameters.** Mean additional cell data. For length and volume n=31-28 cells/N=3-5 animals, for raw peak  $I_{\text{Ca-L}}$ , n=15-45 cells/N=7-19 animals. Statistical significance determined using mixed model analysis.

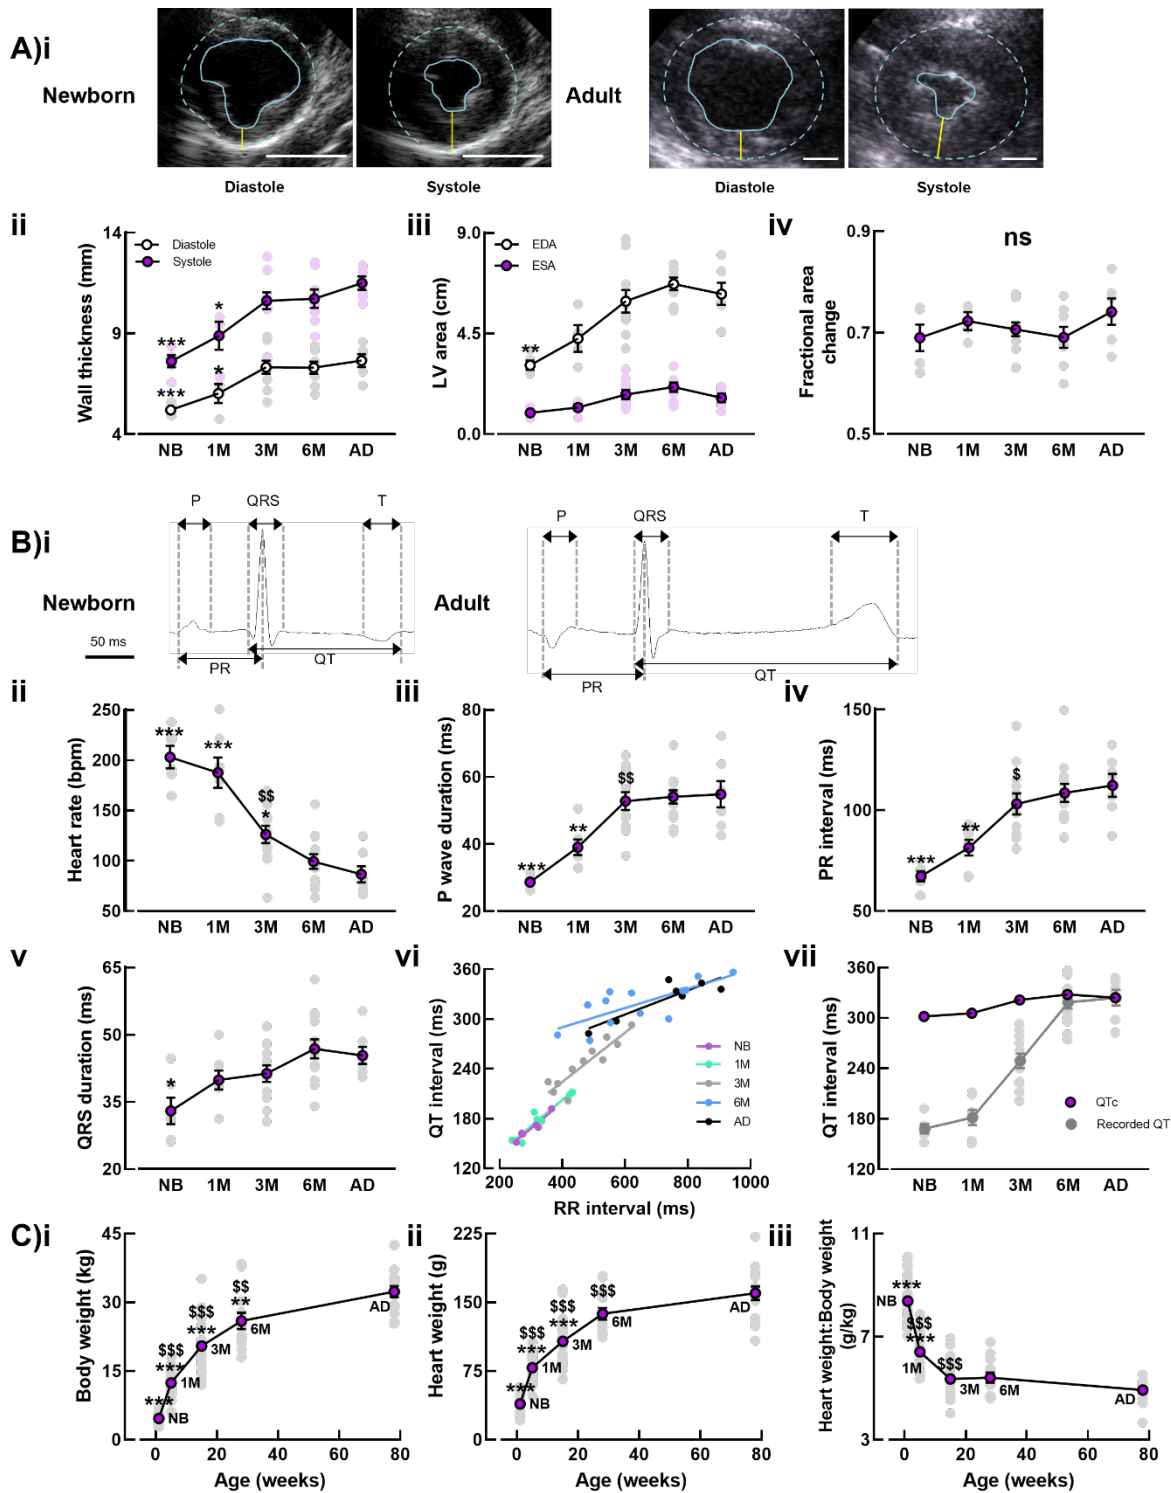

**Supplemental Figure 1 – In vivo characterisation of sheep postnatal development.** Transthoracic echocardiography was used to measure developmental changes in ventricular size and contractile function. (Ai) Representative short axis views during diastole and systole of the newborn and adult heart. Posterior wall thickness (Aii, yellow line Ai) and left ventricular area (end diastolic area; EDA and end systolic area; ESA; Aiii). Fractional area change (Aiv) calculated as the  $(ESA - EDA)/EDA$ . Typical electrocardiograms for the newborn and adult (Bi) that were used to calculate heart rate (Bii) and mean ECG parameters (Biii-vii) measured as shown in Bi. Recorded QT interval (grey symbols) and the corrected QT interval (QTc) where QT was corrected for heart rate using the regression lines displayed in Bvi (Bvii). Mean body weight, heart weight and the heart weight:body weight ratio calculated over the time course of neonatal development (Ci-iii). A, N=4-10 animals. B=6-13 animals. C, N=15-40 animals. \*  $p < 0.05$ , \*\*  $p < 0.01$ , \*\*\*  $p < 0.001$  vs adult, \$  $p < 0.05$ , \$\$  $p < 0.01$ , \$\$\$  $p < 0.001$  vs previous time point, using one way ANOVA. Scale bars = 2 cm.

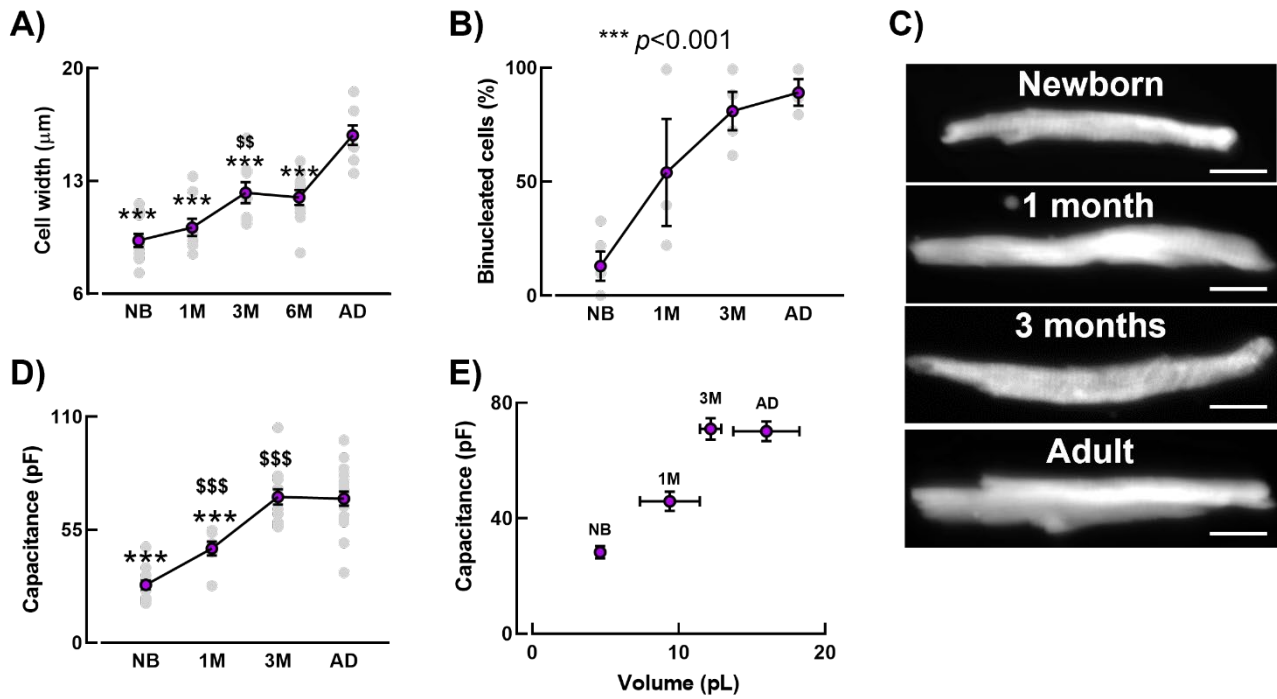

**Supplemental Figure 2 – Developmental changes in atrial myocyte size and structure.** Mean data for cell width obtained from confocal z-stacks of cells stained with ANEPPS (A). Cells at each developmental stage were loaded with calcein and imaged confocally through the z-plane (C). The number of nuclei were also recorded from the calcein images and expressed as the percentage of binucleated cells (B). A 10 mV hyperpolarising step was applied to patch clamped cells to record capacitance (D). Capacitance was plotted against cell volume, calculated from confocal z-stacks where three dimensional reconstructions, to calculate surface area to volume ratios and the relationship shown in E. A,  $n=41-61$  cells/ $N=8-11$  animals For capacitance,  $n=15-45$  cells/ $N=7-19$  animals, for volume,  $n=29-38$  cells/ $N=3-5$  animals. \*  $p < 0.05$ , \*\*  $p < 0.01$ , \*\*\*  $p < 0.001$  vs adult, \$  $p < 0.05$ , \$\$  $p < 0.01$ , \$\$\$  $p < 0.001$  vs previous time point, using linear mixed models analysis. Scale bars = 10  $\mu\text{m}$ .

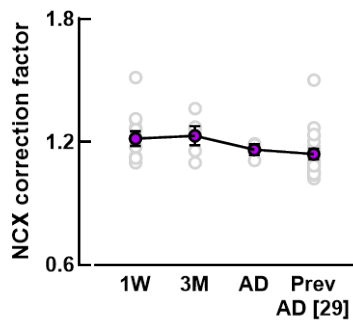

**Supplemental Figure 3 – NCX correction factor is unchanged in development.** The contribution of pathways other than  $I_{NCX}$  to  $Ca^{2+}$  removal during caffeine application was calculated by calculating the rate of decay of the caffeine evoked  $Ca^{2+}$  transient in the presence of 10mM Nickel (to inhibit NCX) and is displayed with our previously published value. n=3-20 cells/N=2-8 animals.
